# Supplementary material for: X-ray CT analysis of pore structure in sand
Source: Copernicus journal article supplement (doi:10.5194/se-2016-16), 2016-02-05
Supplement: Supplementary file [file se-2016-16-AC1-supplement.zip]

# X-ray CT analysis of pore structure in sand

Toshifumi Mukunoki<sup>1</sup>, Yoshihisa Miyata<sup>2</sup>, Kazuaki Mikami<sup>3</sup> and Erika Shiota<sup>1</sup>

<sup>1</sup> X-Earth Center, Graduate School of Science and Technology, Kumamoto University, 1-39-2 Kurokami Kumamoto-city, Kumamoto, JAPAN

<sup>2</sup> Department of Civil and Environmental Engineering National Defense Academy, 1-10-20 Hashirimizu, Yokosuka, JAPAN

<sup>3</sup> Japan Oil, Gas and Metals National Corporation, Toranomon Twin Building 2-10-1 Toranomon, Minato-ku, Tokyo, JAPAN

Corresponding author to: Toshifumi Mukunoki (mukunoki@kumamoto-u.ac.jp)

## ABSTRACT

The development of microfocused X-ray computed tomography (CT) devices enables digital imaging analysis at the pore scale. The applications of these devices are diverse in soil mechanics, geotechnical and geoenvironmental engineering, petroleum engineering, and agricultural engineering. In particular, the imaging of the pore space in porous media has contributed to numerical simulations for single-phase and multiphase flows or contaminant transport through the pore structure as three-dimensional image data. These obtained results are affected by the pore diameter; therefore, it is necessary to verify the image preprocessing for the image analysis and to validate the pore diameters obtained from the CT image data. Moreover, it is meaningful to produce the physical parameters in a representative element volume (REV) and significant to define the dimension of the REV. This paper describes the underlying method of image processing and analysis and discusses the physical properties of Toyoura sand for the verification of the image analysis based on the definition of the REV. On the basis of the obtained verification results, a pore-diameter analysis can be conducted and validated by a comparison with the experimental work and image analysis. The pore diameter is deduced from ~~Young~~-Laplace's law and a water retention test for the drainage process. The results from previous study and perforated-pore diameter originally proposed in this study, called the voxel-percolation method (VPM), are compared in this paper. In addition, the limitations of the REV, the definition of the pore diameter, and the effectiveness of the VPM for an assessment of the pore diameter are discussed.

Key words: Pore diameter, Image analysis, REV, percolation, X-ray CT

## 1. INTRODUCTION

The estimation of pore dimensions and pore networks in soil is one of the most important studies to evaluate the mechanical and hydrodynamic properties for soil science [Topp and Miller (1966)], soil mechanics [Carman (1939), Mualem (1976), Dullien (1992), and Chanpus (2004)], geotechnical and geoenvironmental engineering, and petroleum engineering [Chatzis et al. (1983), Culligan et al. (2006), Gharbi and Blunt (2012)] ~~Brooks and Corey (1964), Bear (1972), Helming (1997), Riyadh (2007)]~~. Carman (1939) considered that water did not seep into straight channels but around irregularly shaped solid particles. Topp and Miller (1966) reported on the water-pressure changes, which shifted the main-branch wetting and drying curves, as well as the families of “rewet” and “redry” scanning loops in the water retention curve (WRC) of glass-bead media. Mualem (1976) proposed a simple model that predicted the unsaturated hydraulic conductivity curves by using WRCs. Chatzis et al. (1983) evaluated the effects of the particle size, the particle-size distribution, the macroscopic particle size, the macroscopic and microscopic heterogeneities, the microscopic dimensions such as the ratio of the pore body to the pore-throat size, and the pore-to-pore coordination number on the residual oil under water-wet conditions. In fact, it is difficult to define the pore dimensions in grains because the pores are surrounded by grains and are thus not isolated. ~~Figure 1 illustrates a pore in spheres. As shown in Figure 1(a), five spheres surround one pore such that the pore should be defined by nine contacting points. However, the pore space is not closed by the five spheres.~~ The shape of a soil particle is not spherical but rather a complicated shape; thus, the pore dimensions are only defined on the basis of some assumptions. In the past decade, microfocused X-ray computed tomography (CT) scanners have been used to study the pore structure and residual fluid in porous media. Culligan et al. (2006) used an X-ray CT scanner to visualize an oil–water–glass-bead system. Gharbi and Blunt (2012) reported that the efficiency of waterflooding as an oil recovery process in carbonates should depend on the wettability and connectivity of the pore space. Figure 2-1 shows an X-ray CT image of a grain sample in two dimensions. The X-ray CT shows the spatial distribution of density, which enables the soil particles and pores to be distinguished. Locally, the longest and shortest length of the pore, as shown in Figure 2-1(a), can be measured by using software for image analysis. However, it is partial property of the pore, and the required information is at least a property in representative volume. It should be required not to measure individual pore ~~dimensions~~ size by using software, but to estimate them by using a systematic method. Moreover, complicated pores have an aspect ratio, as shown in Figure 21; thus, a discussion of connectivity of pores will be required for the study of the hydrodynamic issue in soils. The aim of this paper is to propose an evaluation method for the

1 pore size.

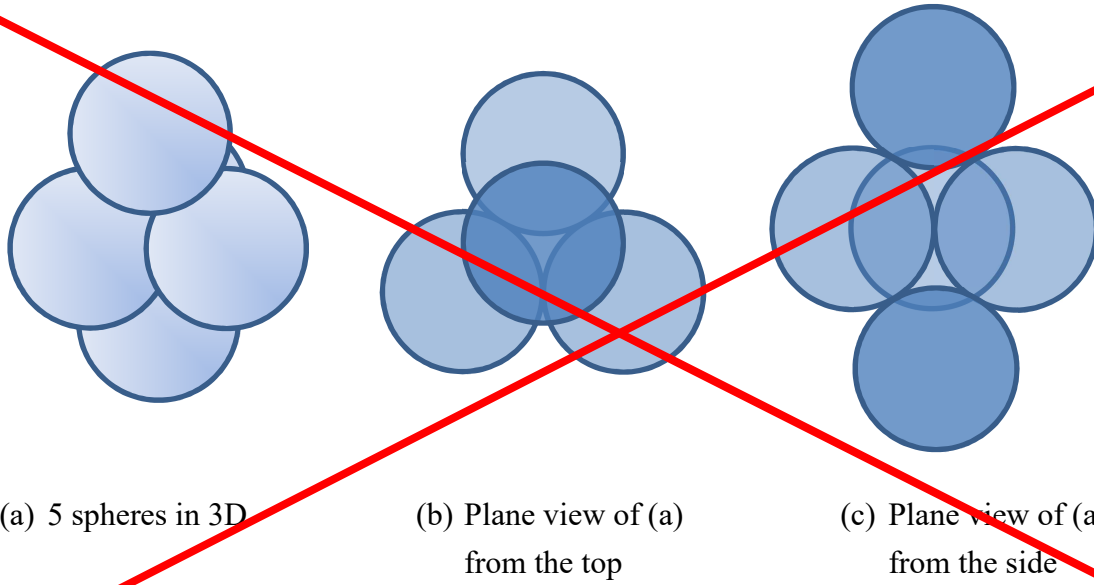

2  
3 ~~Figure 1: Illustration of spheres for pore-surrounded particles—Omit~~

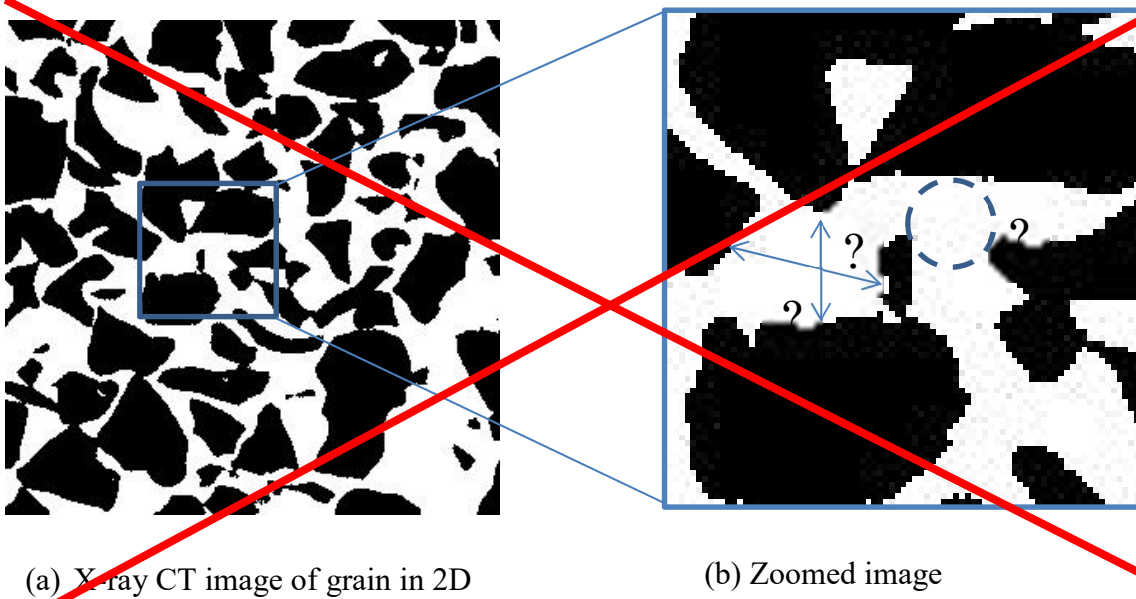

4  
5 ~~Figure 2: Binary image of a pore in grains (white indicates pore space and black indicates particles)~~

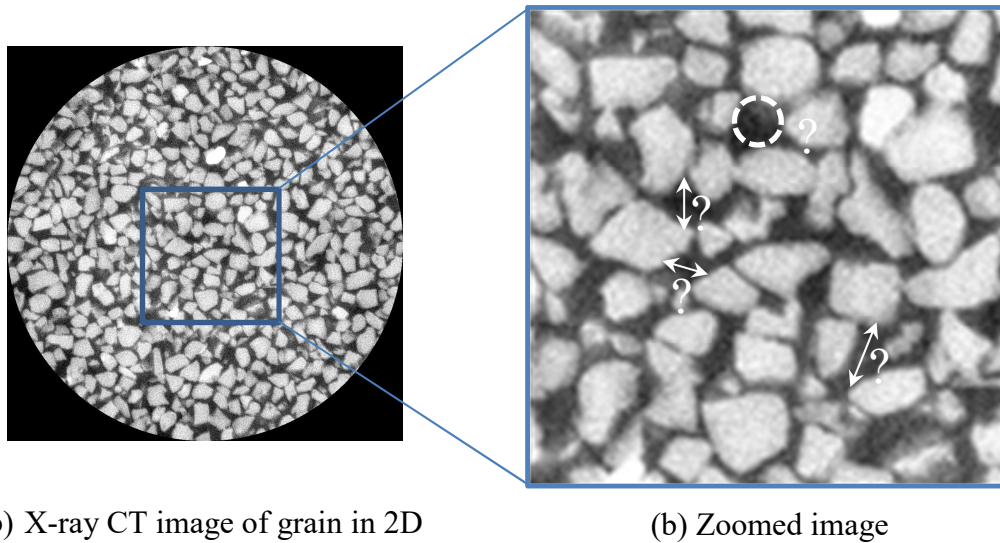

(b) X-ray CT image of grain in 2D

(b) Zoomed image

Figure 1-: Binary image of pores between grains (black indicates the pore space and white indicates the particles)

We now review the current techniques for pore analysis. The most popular methods for measuring pores in soil are the indirect methods of a mercury intrusion porosimetry (MIP) or the air intrusion method (AIM). These methods are based on the concept that the pore structure is assumed to be a straight tube. Through the recent developments of the scanning electron microscope (SEM) and nondestructive testing methods such as CT and magnetic resonance imaging (MRI), the pore structure in soil can be directly measured [Tomotsune et al. (2015)]. The application of CT to soil mechanics with respect to the localization of the soil under triaxial compression was reported by Desrues et al. (1996). Otani et al. (2000) evaluated the crack width of undisturbed clay using an industrial X-ray CT scanner. Likewise, the applications of CT to geotechnical engineering have been diverse over the past two decades. ~~CT is applicable by using rays, for example, sound, ultrasound, x-ray and gamma ray, so that the pore structure of various engineering materials [Otani and Obara (2003), Desrues et al. (2006), Alshibli and Reed (2010) and Cnudde and Bernard (2013)] can be scanned. Additionally, In particular,~~ advanced CT has been developed to scan at the microscale. For example, Altman et al. (2005) evaluated synchrotron-source X-ray CT for the visualization of flow phenomena in rock sample. Wildenschild et al. (2002) and Wildenschild et al. (2005a), Wildenschild et al. (2005b) focused on the flow process in the pores between sand particles using a microfocused X-ray CT scanner and successfully visualized in granular materials. ~~Mukunoki et al. 2010,~~ Higo et al. (2011) studied the deformation of unsaturated sand using X-ray micro-CT scanner and discussed the pore size and the meniscus in a pore. ~~Wildenschild and~~

~~Sheppard (2013)~~, As for a discussion of a capillary in soil, Andrew et al. (2014) and Andrew et al. (2015) developed a system that conducts a CO<sub>2</sub> flow test and acquires images of rock grains and then discussed the snap-off phenomena in the pore structure. ~~and~~ Taylor et al. (2015) have a similar motivation as our research; they visualized the pores between sand particles and originally developed a void segmentation technique. Yang et al. (2015) focused on the issue of geologic carbon storage (GCS) and presented the direct extraction of the pore-size distribution in a porous structure without an approximation or a complex calculation. Further, Yang et al. (2015) tried to predict the WRC on the basis of a comparison of measurements obtained by MIP. Andrew et al. (2014, 2015) and Taylor et al. (2015) strictly evaluated the pore size; however, a study on the relationship between the capillary phenomena and the pore size and its distribution in three dimensions is still under discussion. Most likely, it is significant but difficult to define the pore size in three dimensions. To evaluate a structure consisting of a large number of pores, a suitable image analysis method is required

This paper discusses an evaluation method for pore structure of sand from microfocused CT scan data. In this paper, the authors distinguish a pore from the pore structure. In the first part of this paper, the authors propose the application of a mathematical morphology method for estimating the pores between sand particles. By showing the analysis results of simple subjects, the usefulness of proposed method will be validated. Next, the importance of the selection of a representative element volume (REV) for estimating the grain-size distribution and the averaged pore index, such as the porosity and specific surface, is discussed. The authors show there is an optimum REV in this paper. On the basis of the above fundamental examination of treating CT data, the authors propose a voxel-percolation method (VPM) to evaluate the pore structure of sand. The estimated results are compared with a WRC test, and the effectiveness of proposed method is described. It is concluded that the resolution required for evaluating the pore structure is almost equivalent to that for a pore. The final objective of this research is to develop a general method for soils. As the primary aim of this research, the evaluation of sand is treated in this study because it is natural material. ~~and has a uniform grain shape.~~

## 2. X RAY-CT SCAN

Table 1 lists the specifications of the micro-focused X-ray CT scanner (TOSHIBA TOSCANNER

32300 FPD) installed at the X-Earth Center at Kumamoto University in 2010. ~~In general, 360-degree radioscopic image data, for an inspection object placed on a sample table, is obtained using an X-ray image intensifier by turning the table while irradiating the object with X-rays. This radioscopic image data is then used in reconstruction calculations, which result in cross-sectional images. Because t~~ The generated X-ray beam is a polychromatic beam with a wide range of frequencies; hence, corrections are made for the beam-hardening effect. Radioscopic images alone are not sufficient to accurately represent the internal components that have a complex structure. Tomographic reconstruction allows the detection of fine flaws, foreign matter, separation, and other phenomena. State-of-the-art technology allows for high-precision and high-speed inspection, permitting new applications in various fields. ~~Figure 3 shows an illustration of the internal view of the micro-focused X-ray CT scanner.~~ The detector is a ~~flat-flat~~ panel detector (FPD), which enables three-dimensional scanning with a cone-shaped X-ray beam. ~~The scan speed depends on the scanning conditions. The sample was placed on the scan table and scanned with the cone-shaped X-ray beam.~~ During scanning, the scan table was rotated to obtain a 360° scan. A back projection of the X-ray attenuation was detected on the FPD. The X-ray CT images obtained were free from the ring artifact normally seen in CT images because the scanner applied a filter function to reduce this during the image reconstruction process.

Table 1 Specifications of the microfocused X-ray CT scanner

|                                     |                                     |
|-------------------------------------|-------------------------------------|
| Radiograph field vision             | 400 mm, height 500 mm               |
| Number of display voxels            | 1024 x 1024                         |
| Resolution                          | 4 μm                                |
| Cone bean scan                      | Normal, Offset, Half                |
| X-ray beam thickness for plain beam | 0.2/0.4/0.6/1.0/2.0 mm              |
| Voltage for x-ray generating        | 240 kV (140W) maximum               |
| Maximum weight for specimen table   | 245 N                               |
| Flat panel detector                 | Effective pixel number: 2000 x 2000 |
|                                     | Range of vision: 400mm x 400 mm     |

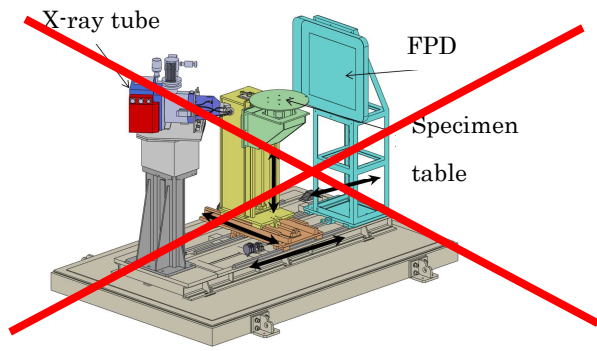

~~Figure 3: Illustration of micro-focused X-ray CT scanner~~

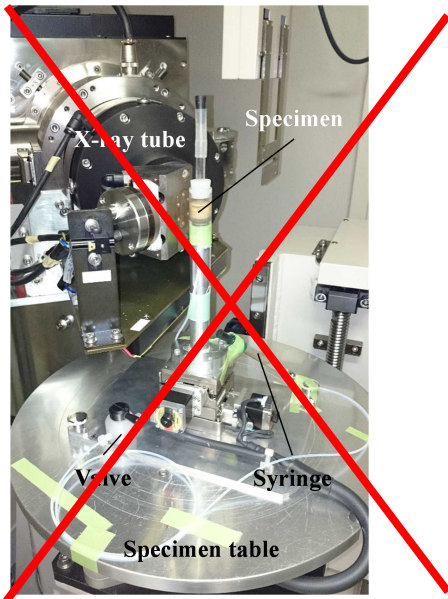

~~Figure 4: Photograph of a scan scene~~

Table 2 lists the scan conditions selected for this study. An X-ray tube voltage of 60 kV and a current of 200  $\mu\text{A}$  were chosen, and the focus-to-center distance (FCD) was defined as 24.7 mm; hence, the dimensions of one voxel are  $5 \times 5 \times 5 \mu\text{m}^3$  in this study. In general, the scan conditions depend on the target of study, and the voltage, current, and FCD should be variable. The scan conditions selected in this study are not absolute conditions, and each user has to find the best conditions to observe the target in each study. The soil tested was Toyoura sand with a dry density of  $1.57 \text{ t/m}^3$  and specific density of  $2.65 \text{ t/m}^3$  (i.e., the porosity was 0.41). **Toyoura sand has been widely used as benchmark sand for civil engineering in Japan, and it is a quartz-dominated sand [Miura et al., (1989) and Oluwapelumi et al. (2012)]. The range of grain sizes is 75–850  $\mu\text{m}$ , and the uniform coefficient, which defined as  $D_{60}/D_{10}$ , is 1.5; hence, Toyoura sand is categorized as a classified soil with low range of grain sizes.** The sample was well-packed into an acrylic mold with a diameter of 10 mm and a thickness of 1 mm. If the diameter of the specimen is greater than 10



mm, e.g., 20–30 mm, the center of the specimen is too far from the X-ray tube, and high-resolution CT images cannot be obtained because of the loss of focus between the X-ray tube and the center of the specimen. In this study, the authors did not use ant special region of interest (ROI) and only used Image J to extract the cubic area of interest from the center of the image.

Table 2 Scan conditions used in this study

|                                    |                    |
|------------------------------------|--------------------|
| Power of voltage (kV)              | 60                 |
| Current ( $\mu$ A)                 | 200                |
| Number of views                    | 1500               |
| Number of integration treatments   | 10                 |
| Voxel dimension ( $\mu$ m) x, y, z | 5 x 5 x 5          |
| Number of voxels (x, y, z)         | 1024 x 1024 x 1000 |

### 3. IMAGE PROCESSING OF ~~A PORE~~THE PORE STRUCTURE IN SAND BASED ON X-RAY CT DATA

#### 3.1 ~~Outline of i~~Image processing of ~~a~~the pore structure in sand

There may be some methods for processing an image of a pore in sand from X-ray CT data. In this paper, the applicability of the mathematical morphology is discussed for the definition of the pore structure. The mathematical morphology describes the complicated shape by using a spherical element whose ~~dimension-diameter~~ is known [Soille (2003)]. The basic operations are available in many image analysis software packages [Luis et al. (2005)].

The basic process for image analysis in this study consists of image segmentation to create a binary image from an original image (Section 3.1.1) and the determination of the pore diameter using a granulometric method based on the mathematical morphology (Section 3.1.2).

##### 3.1.1 Image segmentation

The most popular method to evaluate the porosity of porous materials from CT data is based on a statistical assumption. The parameters of a distribution function based on the CT data can be



determined by an optimization technique [e.g., Kato et al. (2014) and Mukunoki et al. (2014)]. The accuracy of these methods depends on the selection of distribution functions based on the CT data. The required number and type of functions are still under research, and there may be a number of solutions to these issues. As the first step of image analysis in this study, the pore and grain are identified from CT-data and Figure S1 shows a histogram of a CT image of Toyoura sand. The image segmentation method developed by Otsu (1979) was used because the Toyoura sand tested exhibited two distinct peaks, as shown in Figure S1. ~~in this study~~. The two peaks in the CT values indicate the two phases of the particles and pore space. During this process, the image is analyzed so that the grains are interpreted as black areas and the pores are white areas. By determining the number of voxel for each region, the averaged index associated with the pore, such as the void ratio, can be evaluated. However, by this process, the distribution of the pores according to size cannot be evaluated.

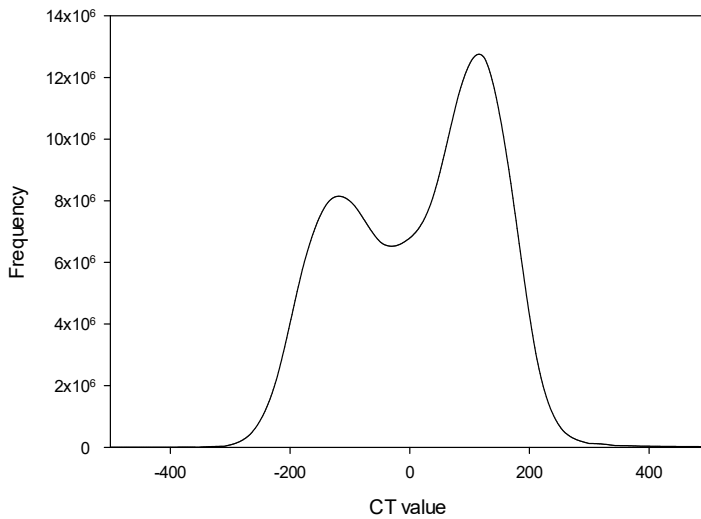

Figure S1: Histogram of the CT data for a CT image of Toyoura sand

### 3.1.2 Granulometric method

In the second step of the image analysis, for each pore identified from the binary data, its shape is evaluated by using the mathematical morphology. On the basis of this concept, a unit element B belongs to a pore X. Then, the unit element in X,  $B_x$ , can be written as follows:

$$B_x = B \cup X \quad (1)$$

It is likely that the shape of the unit element is a square or circle with a symmetric shape. In this study, the target subject is a pore, and we are interested in its size. By obtaining an image of a pore

from an X-ray CT scanner, the dimensions of the pore can be determined by using the unit element because the dimensions of the unit element can be modified. In this study, the unit element of a sphere is used therefore the element is called a spherical element in this paper.

Figure 5-S2 illustrates the spherical element. In this study, thirteen spherical element sizes are used. In this figure, the first three spherical elements for the granulometric method are shown in Figure S2. The maximum radius  $r$  of the spherical element in this study is  $r = 13$ . At the beginning of the granulometric image analysis (GIA) process, the maximum size of a spherical element is not known; therefore, only the appropriate number of radii of the spherical element is given. The GIA analysis continues that the radius of the spherical element is increased until there are no pores that fit that element. The smallest element is one voxel (Figure. 5S2(a)). Elements with a less radius do not appear exactly spherical in shape. However, an element becomes more spherical as the number of voxels is increased for a specific diameter of that structural element, as shown in Figure 5. The voxel number corresponding to the diameter of a spherical element,  $D$ , can be defined as follows:

$$D=2r+1 \quad r \geq 0 \quad (2)$$

where  $r$  is the number of voxel from the center of the spherical element. As shown in Figure 5S2, when  $r$  is 1, which is the minimum number,  $d$  is 3; therefore, the diameter of a spherical element is 3. The diameter increased on the basis of the center inclusion concept; thus, the diameter of the spherical element should be always an odd number. As  $r$  increases further, the shape of the spherical structure becomes more spherical. It is proposed that the diameter of a spherical element is the pore size at the corresponding location in this study. For the generation of a spherical element with different dimensions, an image tool kit called ITK [Luis et al. (2005)] was used.

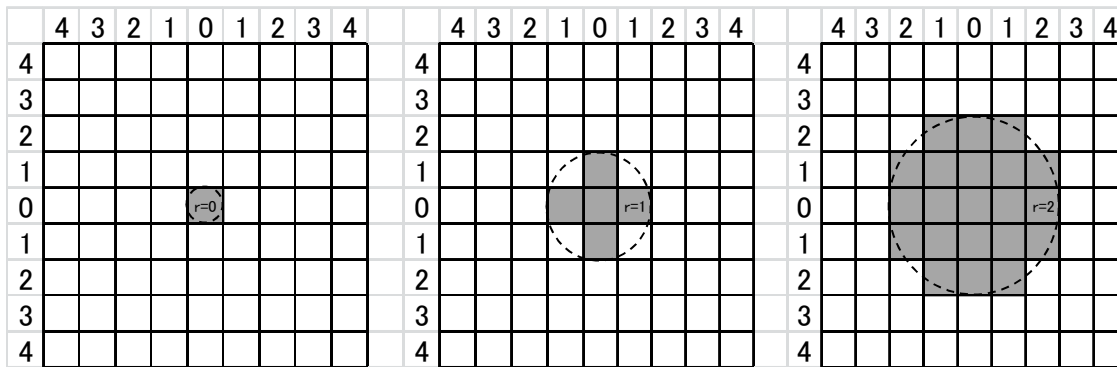

(a) (b) (c)

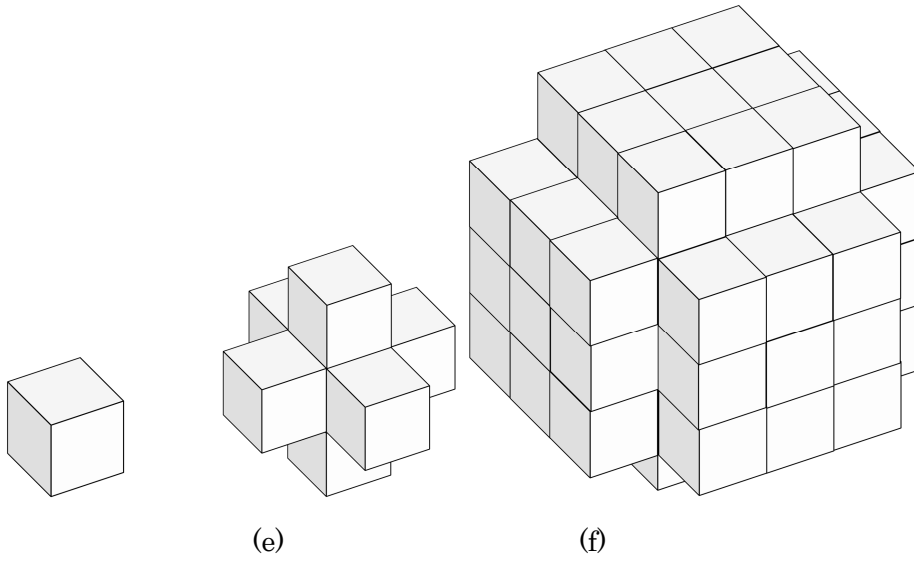

Figure S2: Illustration of sphere elements with different diameters in 2D and 3D views

The granulometric method can recreate the complicated pore space by overlapping spherical elements having several different diameters. Initially, the smallest spherical element, i.e., one voxel, should be applied to the analysis area, which is a pore space, and it should occupy the entire pore space. Then, the next larger spherical element with a diameter of three voxels, as shown in Figure S2 (b), is applied to the same area of pore space, but the next larger spherical element cannot occupy the entire pore space, as shown in Figure S2 (c). Likewise, the entire pore space is scanned by each spherical element. For a more complicated pore shape, more spherical elements having different diameters will be required. In the granulometric method, a spherical element may be partially overlapped; hence, the distribution of the pore diameter indicates that the nonoverlapping part of a spherical element is evaluated. In addition, the sum of the ratios of overlap of spherical elements at each step can be used to evaluate the pore volume and degree of saturation by the VPM, as explained in the following section.

### 3.2 Verification of area measurement using granulometric method image processing for simple objects

It is noted that a spherical element is referred to as a circular element in this section because the target subject is drawn in two dimensions. At the end of the image analysis using the GIA, the number of voxels in each circular element can be counted. The accuracy of the area measurement by the GIA is verified by comparing the number of counted voxels with the calculated areas of a

circle and square. ~~Figure 6(a)–(e) explains the features of the granulometric method.~~ Figures 2 (a) and (b) show a black circle and a black square rotated 45° in an area with dimensions of 200 × 200 voxels (i.e., the total number of voxels is 40000), and Figure 2 (c) shows the circle and square drawn in an area with dimensions of 400 × 200 voxels (i.e., the total number of voxels is 80000). The space other than the circle and square is defined as the pore space. (see Figure 2 (a) and (b)). The color legend indicates the diameter of the circular element: white corresponds to the largest diameter of the circular element. As the diameter is reduced, the color becomes dark. ~~All images classified by each sphere element, as shown in Figure 6, were overlapped in the order of the diameter of the circle element.~~ The number of voxels for the smallest circular element is equal to the number of pore structures in total. ~~Hence, the number of voxel for circle element greater than the minimum circle element should be less than the number of pore spaces. Finally, all circle elements are overlapped due to the radius of the circle element and the total number of voxel is same as that of the pore space.~~ Table 3 summarizes the area of the pore space obtained from the GIA and the areas calculated for the solid and pore spaces by the following set equation: ~~as shown in Table 3; and then, it~~ GIA provides can be ~~expressed by the following set equation;~~

$$S = \sum_i^n B(r_i) - \sum_i^n \{B(r_i) \cap B(r_{i+1})\} \quad i=0, 1, 2, \dots, n \quad (3)$$

where  $S$  is the number of voxels as the total area ~~/volume~~ counted by GIA, and  $B(r_i)$  is the area ~~/volume~~ of the circle/ spherical element with a radius from  $i$  to  $n$ . When  $i$  is equal to  $n$ ,  $S$  is equal to the target area/volume. Even if the shape of the pore space is complicated, as in Figure 62(c), the GIA can estimate the total number of voxels (see Table 3). ~~Note that each circle element labeled and its location were also recoded; hence, the spatial distribution of the overlapped circle element can be visualized as shown in Figures 6. Here, it should be recognized that the diameter of the circle element cannot become a pore diameter directly. Hereby, a definition of pore diameter is required.~~

Table 3 Verification results of GIA

|               | Voxel counts |            |            | Area by calculation         |             |             | Square error (SE)*     |
|---------------|--------------|------------|------------|-----------------------------|-------------|-------------|------------------------|
|               | Solid        | Pore space | Total area | equation                    | Solid       | Pore space  |                        |
| Circle        | 31428        | 8572       | 40000      | $\pi r^2$<br>100x100x3.1428 | 31428       | 8572        | 0                      |
| Square        | 19801        | 20199      | 40000      | L x L<br>140.716x140.716    | 19800.99266 | 20199.00734 | 5.393x10 <sup>-5</sup> |
| Square Circle | 51229        | 28771      | 80000      | $\pi r^2 + L \times 2L$     | 51228.9927  | 28771.0073  | 5.329x10 <sup>-5</sup> |

SE = (Voxel counts – Calculation)<sup>2</sup> for each case

If the diameter of a spherical element is equivalent to the pore diameter, its pore geometry must be a set of parallel lines or a rectangular shape. The area enclosed in dotted lines, as shown in Figures 6-2(d) and (e), was analyzed by the GIA, and both areas were found to be 19801 Voxels. The two artificial images in Figures 62(d) and (e) can provide an interesting discussion. Certainly, the GMA estimates the width in the area of the diamond; despite the fact that the definition of width is vague, GMA-GIA produced Figure 62(d). Even if the target image is rotated by 45°, the same results should be obtained. ~~GMA searches the minimum pore space first and then, the sphere element with the diameter due to order of odd number becomes larger.~~ The results in Figures 2 (d) and (e) indicate that the GIA provide the same results, even though the shape of the pore space changed; hence, the GIA can scan the complex pore structure to investigate the pore size. The point is that the spherical element evaluates the space at the four corners, as shown in Figure 62(e). This result indicates the important feature of this image analysis; in short, the spherical element finds small pore spaces and evaluates the pore size by the part remaining after the overlapping process. This behavior, whereby the spherical element finds the small space, is similar to the capillary behavior in porous materials such as sand. Note that the labelled number is given to each circular element and its number is corresponding to the radius of circular element. Besides the location of each circular element is also recoded; hence, the spatial distribution of the overlapping circular element can be visualized as shown in Figure 2. The GIA is very useful technique because the pore size can be evaluated without measuring the individual pores. However, it should be recognized that the diameter of the circular element is not strictly equal to the pore diameter. The authors suggest a diameter for the spherical elements fitting the pore space as the pore size in sand; this will be discussed later in Section 4.

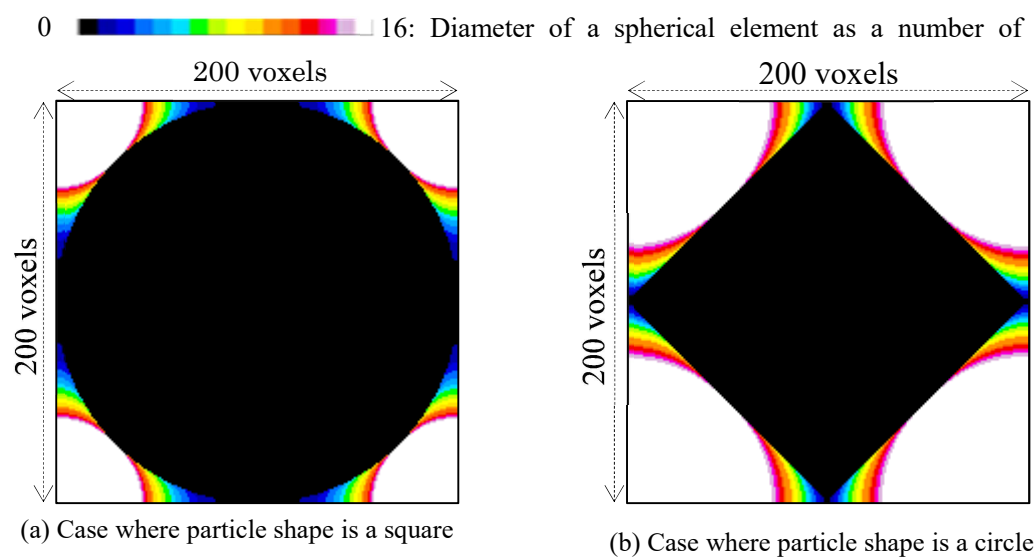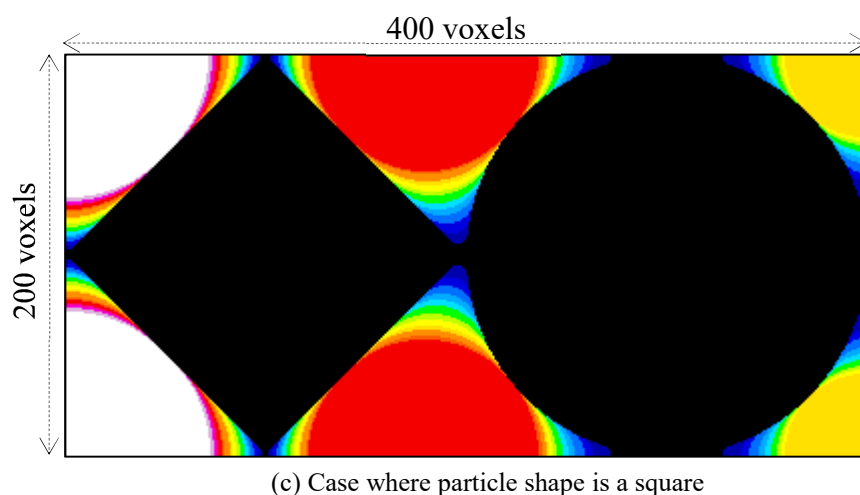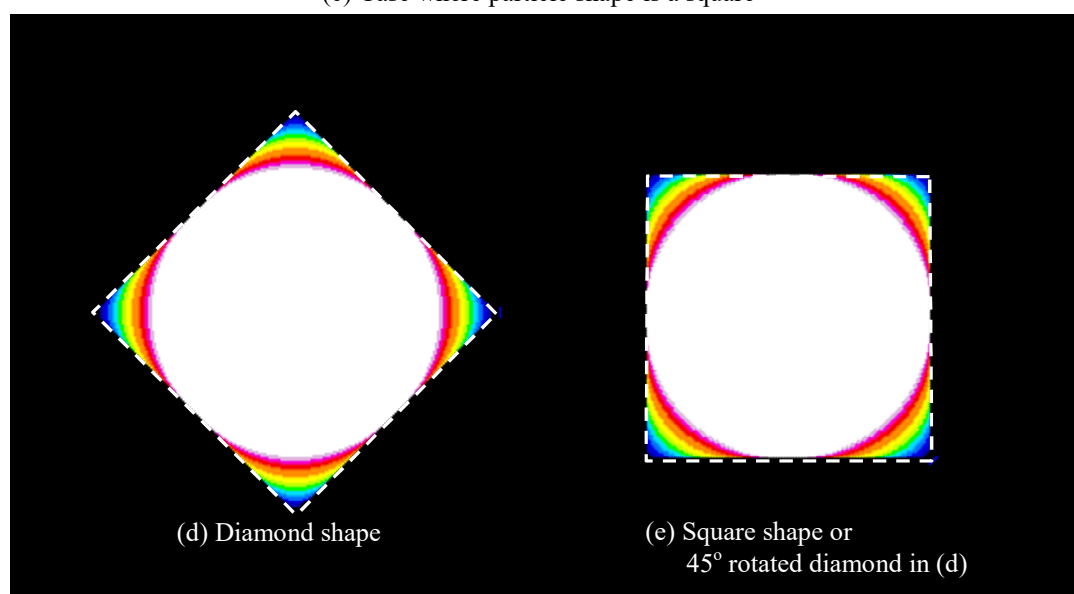

1

2 | Figure 62: Explanation of features of ~~GMI-GIA~~

### 3.3 Selection of appropriate Representative Element Volume (REV) for analysis of sand

The REV of CT image should be discussed to estimate the geometrical properties of sand by an image analysis. In this study, the porosity and specific surface area of Toyoura sand were evaluated, and the REV was assessed. The detailed steps can be found in Fujiki et al. (2014); hence, the concept is only introduced. A subsampling region is defined the porosity ( $n$ ) and specific surface area ( $S_{sp}$ ) are calculated from the CT image using the following equations:

$$n = \frac{V_{pore}}{V_t} \quad (4)$$

$$S_{sp} = \frac{S_{ps}}{V_t} \quad (5)$$

where  $V_{pore}$  is the volume of the pores,  $V_t$  is the total volume of the specimen, and  $S_{ps}$  is the mean surface area of the grains obtained from the CT image. In addition, the means and standard deviations of the porosity and specific surface area are calculated. The ~~process from the above items 1 to 3~~ above described process is continuously repeated owing to the enlargement in the calculation region until the relative standard deviation (RSD), which is defined as the standard deviation divided by the mean, is less than 1%.

~~Figures 7(a) and (b) show the two-dimensional images of particles of Toyoura sand in each square dimension. The dimension of the CT image of Figure 7(a) is 1024 x 1024; however, if the extraction of the cubic area from this CT image is required, the maximum voxel number to be used is 700, as shown in Figure 7 (a). The image can be obtained from binary images following the image segmentation process. In this study, the Ohtsu method was applied to create binary images. Figure 3 shows For each three-dimensional images, the porosity and specific surface area were evaluated to validate the representative volume. The measured porosity of the specimen was 0.41. and the analyzed porosity was 0.431, so both values were a good fit. Figure 84(a) and(b) show the analyzed porosity and specific surface area with along with their RSDs for various subsample sizes. In this analysis, the domain size of the subsample size and the location for the initial calculation of the porosity and specific surface were randomly changed 20 times; then, the RSD for each voxel size was calculated. The porosity and specific surface analyzed from the CT images converged~~



1 owing to the increase in the voxel size; moreover, a tendency to decrease is observed for both  
 2 parameters. The behavior observed for porosity results in close measured value. The difference  
 3 between the porosity and the specific surface is not significant for the tested materials but, generally,  
 4 the REV should depend on the properties of the medium.

5

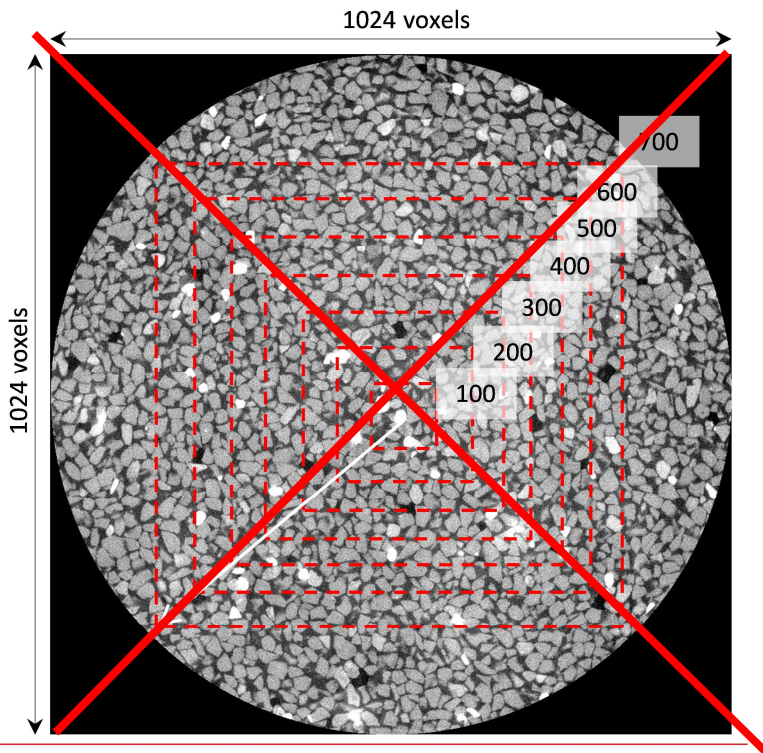

6

7 **Figure 7(a): X-ray CT image of Toyoura sand with different regions of image analysis in 2D**

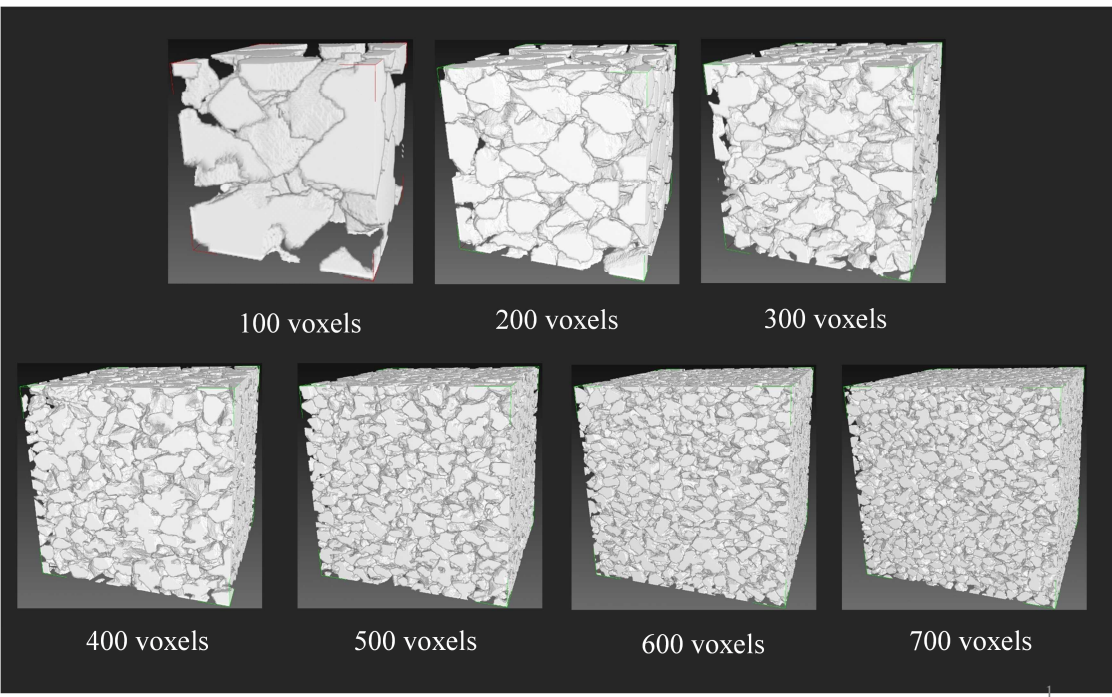

8

1 | Figure 7(b)3: X-ray CT image of Toyoura sand with different regions of image analysis in 3D  
2

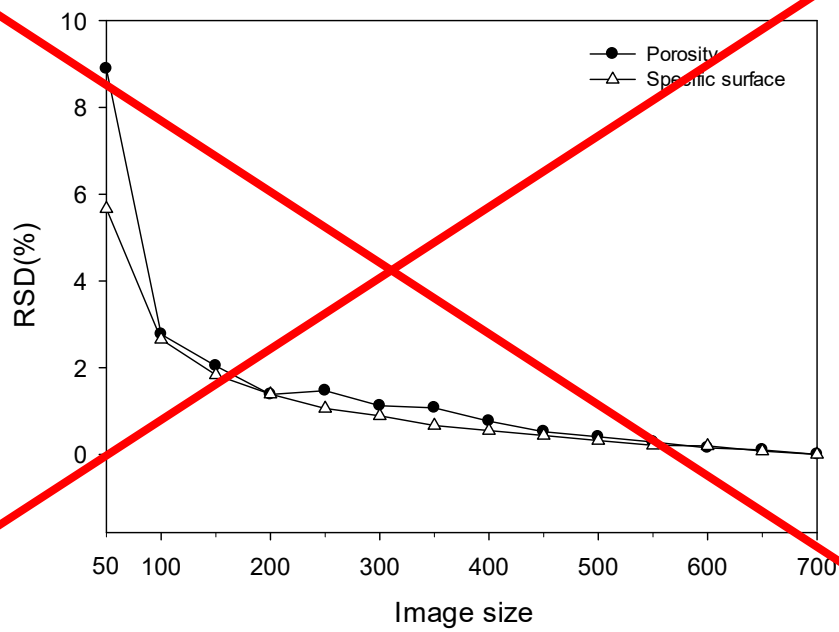

3 |  
4 | ~~Figure 8: Relative standard deviation by changing the dimension of image analysis~~

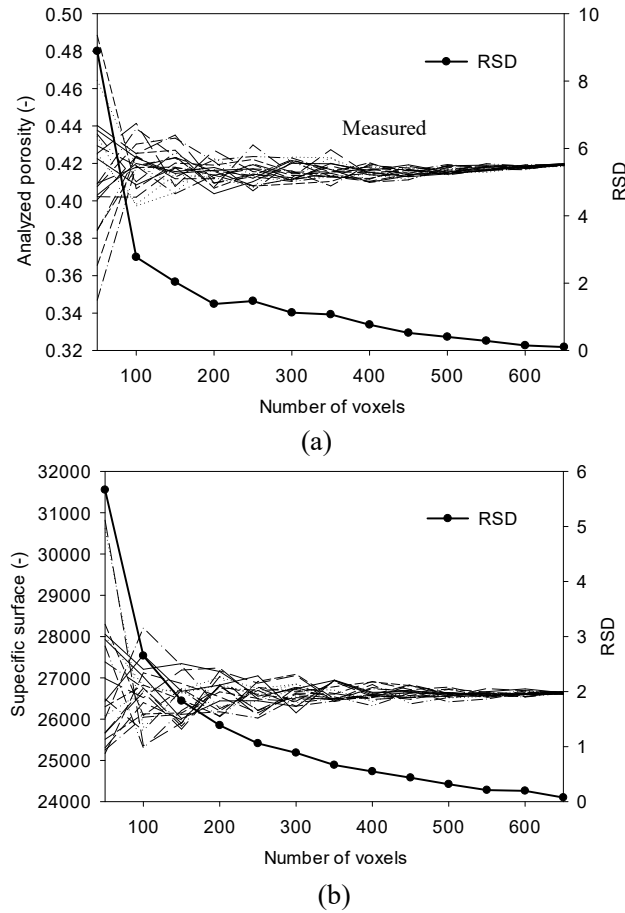

Figure 4: Relative standard deviation by changing the dimension of image analysis

Figure 9-5 shows the distributions of the grain size obtained from a sieving test and an image analysis. The grain-size distribution can be obtained from Image J for the image analysis, which is provided using the function “object counter.” With the exception that the image analysis area is a cube consisting of 100 voxels, the grain-size distribution obtained from the CT image fits the results of the sieving test well. ~~Figure 10 shows the relationship between the image analysis area and the particle diameters analyzed. The subscript number D means the percentage value finer, by weight, obtained from Figure 9. The Figure 10 results show that a cubic area of more than 300 voxels can provide a constant grain size for each percentage finer by weight.~~ The results are summarized in Table 4. The effect of the size of the reference sample is not significant. This observation supports the fact that the sample with a voxel size of 300 (or 1.5 mm) is larger than the REV when the size of one voxel is 5  $\mu\text{m}$ .

1     Table 4 Results of REV analysis

|           | Porosity,    Specific surface |
|-----------|-------------------------------|
| RSD < 5 % | L > 900 μm (or 100 voxels)    |
| RSD < 2 % | L > 1800 μm (or 160 voxels)   |
| RSD < 1%  | 1500 μm (or 300 voxels)       |

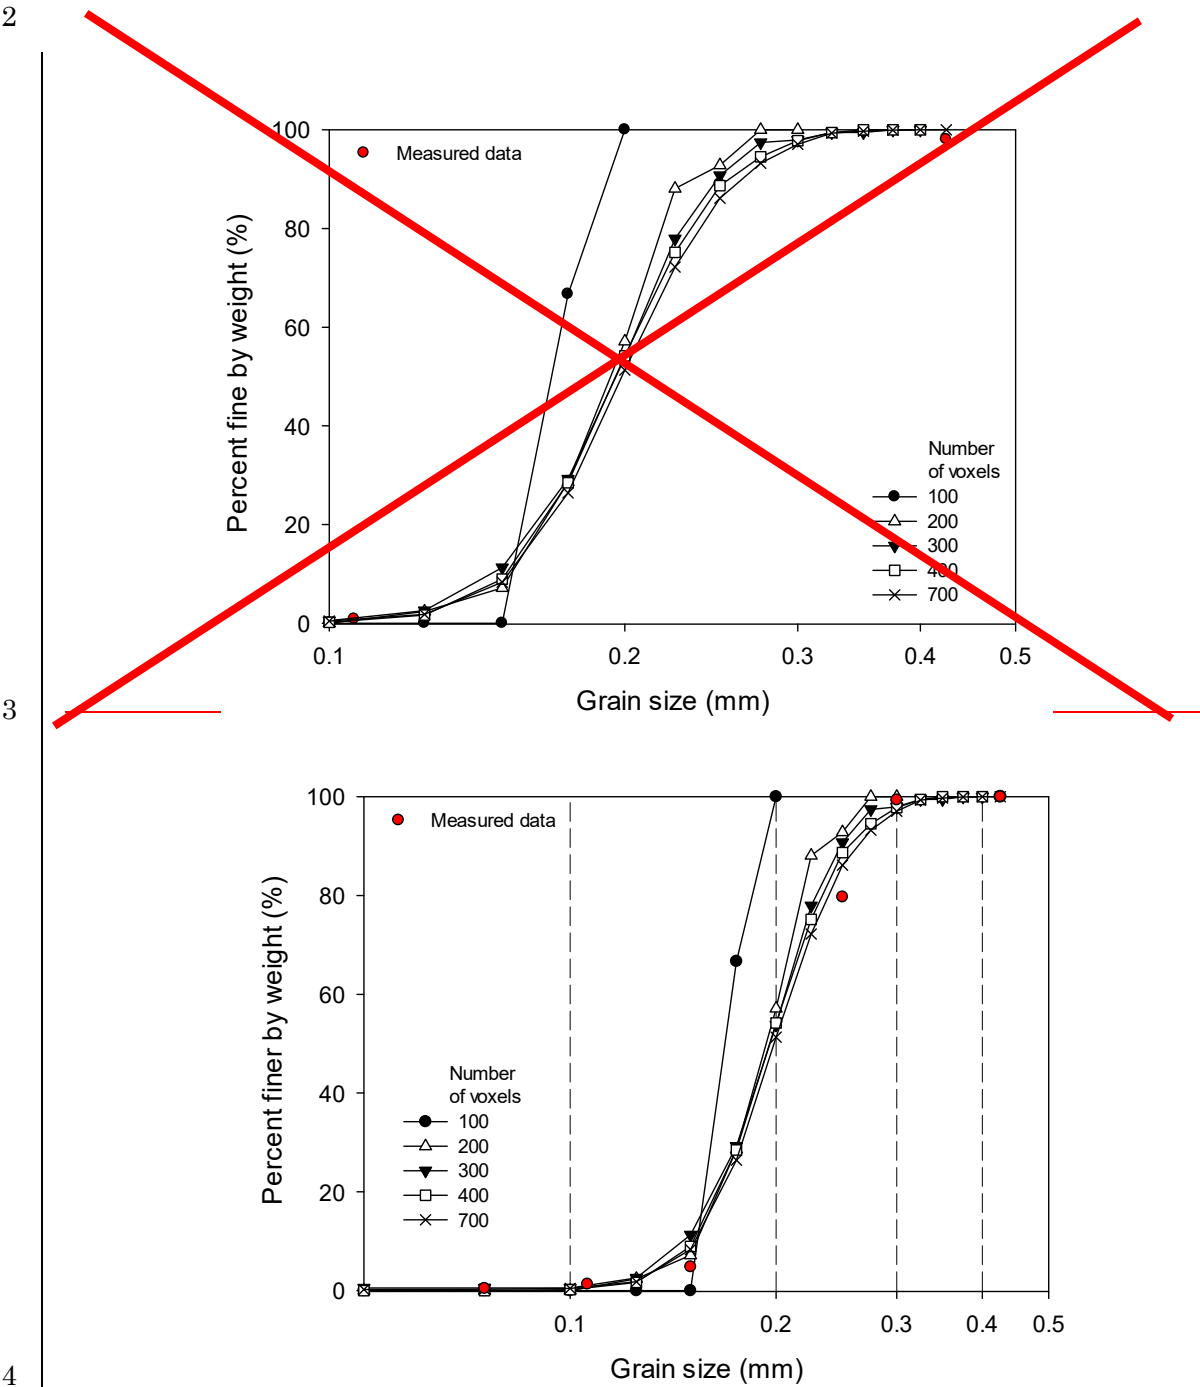

Figure 95: Grain size distribution curve obtained from image analysis

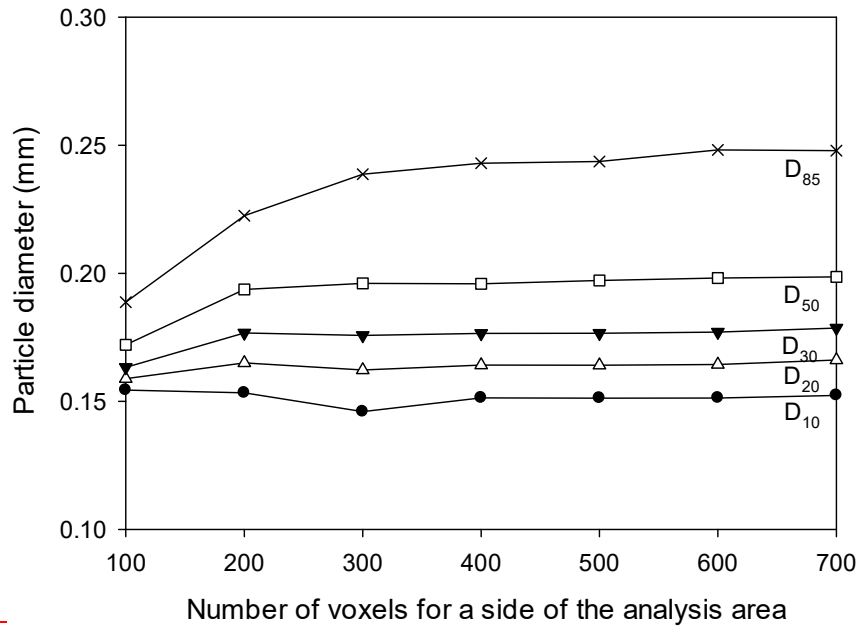

Figure 10: Grain level on each image size

#### 4. ANALYSIS OF WRC USING THE PROPOSED METHOD OF PORE STRUCTURE

##### 4.1 Water retention test for sand

In this study, a water retention test with a reducing elevation head method (WRT-REHM) was selected to conduct water drainage tests because it was available to measure the moisture content of identical specimens at different elevation heads during the water drainage process. The specimen used for the WRT-REHM was identical to the scanned sample. Figures 6 (a) and (b) show photographs of the setup used for the water drainage test system with a suction method, and Figure 6 (c) shows a cross-sectional view of a mold that was tested. The mold is made of an acrylic, through which an X-ray beam could be transmitted without strong beam-hardening. The dimensions of the mold were a height of 120 mm, an inner diameter of 10 mm, and a thickness of 1 mm. In order to measure the amount of drained water, a glass syringe was used with a scale of 0.01 ml. A membrane filter with a mean pore diameter of 0.2  $\mu\text{m}$  was placed on a glass filter with a pore diameter between 20 and 30  $\mu\text{m}$  installed on the bottom of the mold. The mold was filled with de-aired water, and an entire system with a syringe, a tube connected between the mold and syringe, a glass filter, and a membrane sheet was fully saturated in the storage mold under vacuum conditions. Toyoura sand with a porosity of 0.43 was carefully installed in the mold filled with de-aired water. The sand specimen was left for 24 hrs. after regulation of the elevation head of the syringe to lead water drainage at each degree of saturation; then, the volume of the syringe was

1 recorded.

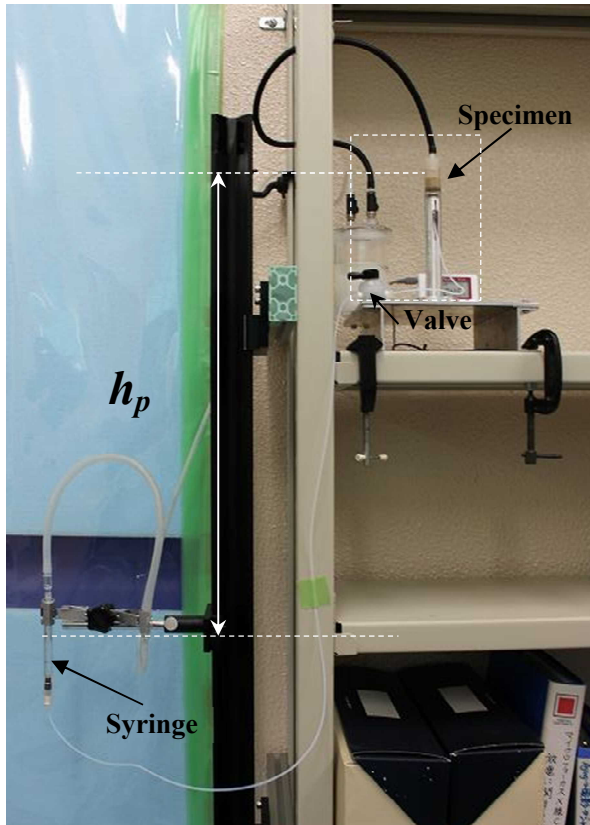

(a) Image of the entire test

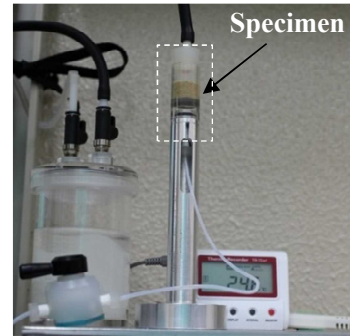

(b) Zoomed image of the specimen

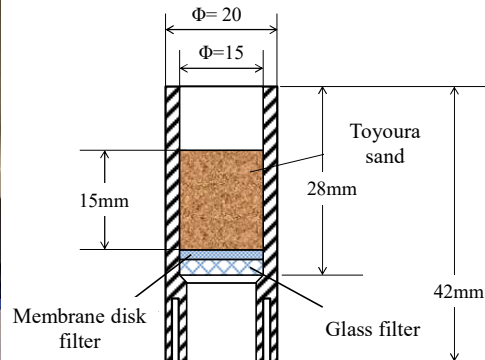

(c) Schematic of the test mold

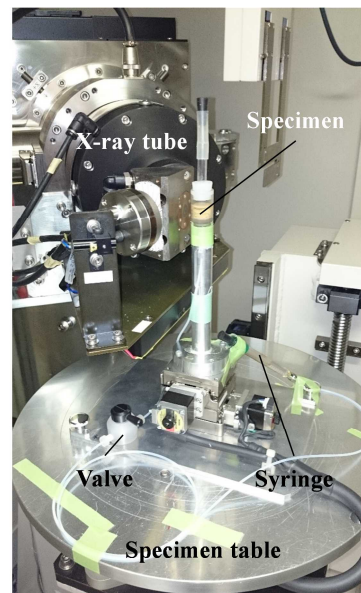

(ed) Schematic of the test mold

2

3 Figure 7 6: Water retention test apparatus with the elevation head method

4

5 The entire test system was set up in a room containing the installed microfocused X-ray CT scanner,



as shown in Figure 6 (d), and the temperature was controlled at  $20\pm 2^{\circ}\text{C}$ . Owing to the change in temperature within the range of  $20\pm 2^{\circ}\text{C}$ , the authors were concerned about the generation of condensation in the mold and extra evaporation from the specimen surface; thus, the humidity in the room was regulated. In the trial test, the authors monitored the time to reach a steady-state condition of the specimen by checking of the fluid volume in the syringe, and it was concluded that this time should be 24 h in this test. Eventually, the authors performed WRT twice in this study.

#### **4.1.2 Pore structure analysis of sample for WRT**

In the process described in Section 3.2, the GIA produces a pore by overlapping many spherical elements. In this section, a pore-structure analysis based on the GIA is described. It is important to consider the three-dimensional continuity of the pore when analyzing the pore structure. In this study, a pore-structure analysis method that performs a vertical air-entry simulation with the imaged pore from the X-ray CT data is proposed. This method is called the VPM. For instance, there are 13 types of spherical elements, as shown in Figure 4.7. For convenience, the images in Figure 4.7 are drawn in two dimensions; therefore, sphere elements should be called circle elements in the explanation of Figure 4.7. In order to start the percolation flow simulation, the rule for water-drainage process should be modeled as follows in this study. First, as follows: Step 1: The original image is binarized into pore space (white) and soil particles (black) (see Figure 4.7(a)). Step 2: The pore space is analyzed by the GIA; thus, the distribution of the labeled spherical elements can be determined (Figure 4.7(b)). Step 3: The VPM finds the labeled voxel of the circular element with the largest radius from the corner of the defined side. As in Figure 4.7(c), only the area of the spherical element with a radius of 13 is shown as white. Fourth, Once VPM finds the voxels labeled 13; then, it will keep painting those voxels until it recognizes no continuous circular element (Figure 4.7(c)-(o)). Likewise, the labeled number of the largest circular element is scanned to the image obtained in the second step; thus, only the voxels corresponding to the largest circular element are counted. Step 3 The third step should be repeated until the smallest circular element is used. Fifth, the results in the fourth step produce the degree of saturation by the sum of the counted voxels divided by the number of voxels in the entire pore. Lastly, the capillary pressure can be evaluated by using Young–Laplace’s equation with the diameter of the circular element. In actual analysis, the describe process in the above can be processed in three dimensions.



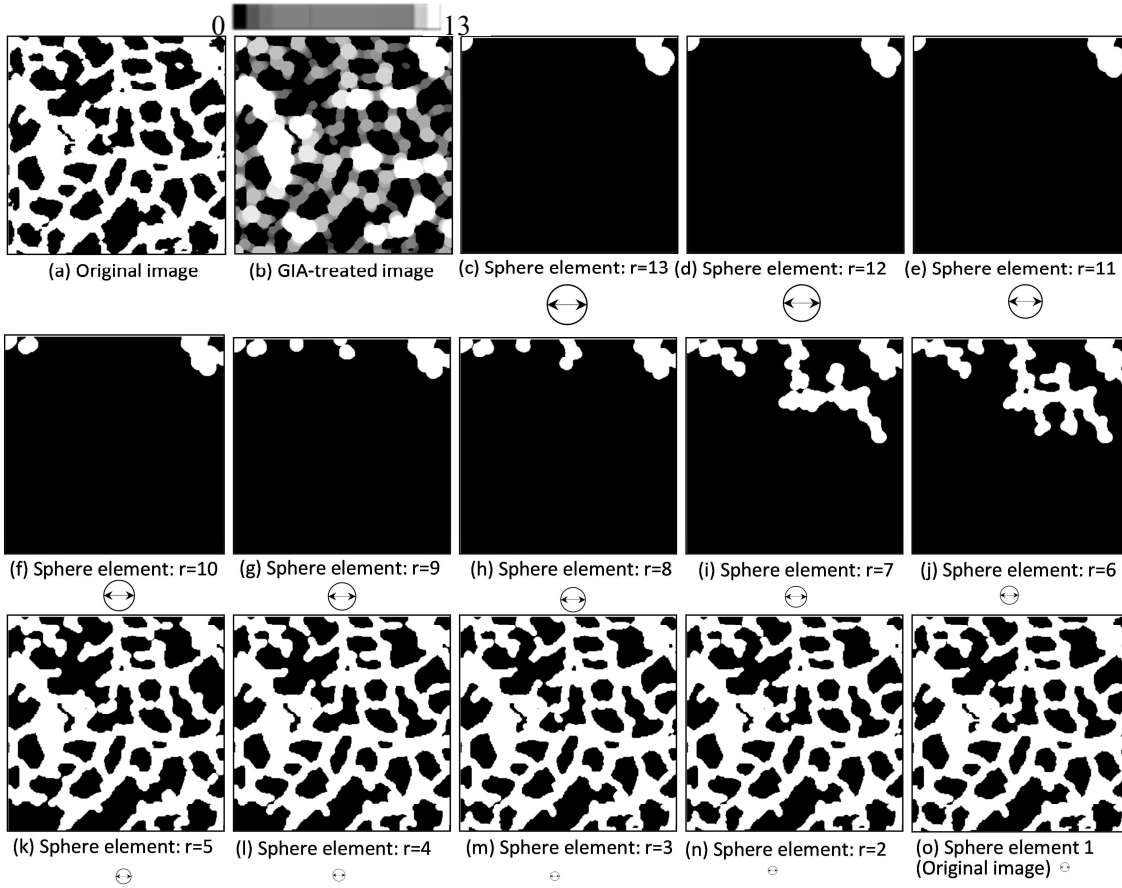

Figure 11-7 VPM analysis in grains (pore)

#### 4.2.3 Analyzed water retention curve

The water retention property of a soil is a typical parameter influenced by pore structure. In this section, the WRC can be reproduced by combining the GIA and VPM. On the basis of Section 4.1.2, the water retention curve (WRC):  $h_p-S_r$  for the drainage process can be drawn. Figure 12 shows the 3D image of the percolation flow. As a first step, the VPM provides the distribution of the connected spherical elements with different sizes; then, all of the voxels with spherical elements share the same label. By sharing the same label, the behavior of the voxels seems to flow, as shown in Figure 12(a)–(f), and this is percolation flow.

The diameter of the spherical element at each step contributes to the calculation of the capillary pressure head ( $h_p$ ) by the Young–Laplace equation as

$$h_p = \frac{4T\cos\theta}{\gamma_w d} \quad (7)$$

where  $T$  is the surface tension between water and air (72.88 mN/m at 20°C),  $\theta$  is the contact angle

1 (49°),  $\gamma_w$  is the density of water, and  $d$  is the diameter of the tube.

2 In this study, a WRC test for the drainage process could be performed; thus, it was simulated by the

3 following treatments. In the first step, each labeled spherical element is categorized, and the

4 spherical element number with the maximum diameter is recognized. Second, the number of voxels

5 with the spherical element number corresponding to the maximum diameter from the direction of

6 the air entry side is counted, and it should continue until the discontinuous condition is reached.

7 Third, the first step yields the capillary pressure head using the Young–Laplace equation with the

8 substitution of the latest perforated diameter. The second step yields the degree of saturation by

9 dividing the number of voxels not counted by the total number of pore spaces. This can be plotted

10 on one WRC. Fourth, once the counting process for the second step is finished, the next label of

11 spherical element should be checked on the basis of the same process detailed in the first three steps.

12 Lastly, the WRC can be created. In order to verify the perforated pore diameter, WRCs were

13 obtained from an experiment at 20°C, and an image analysis was carried out in this study.

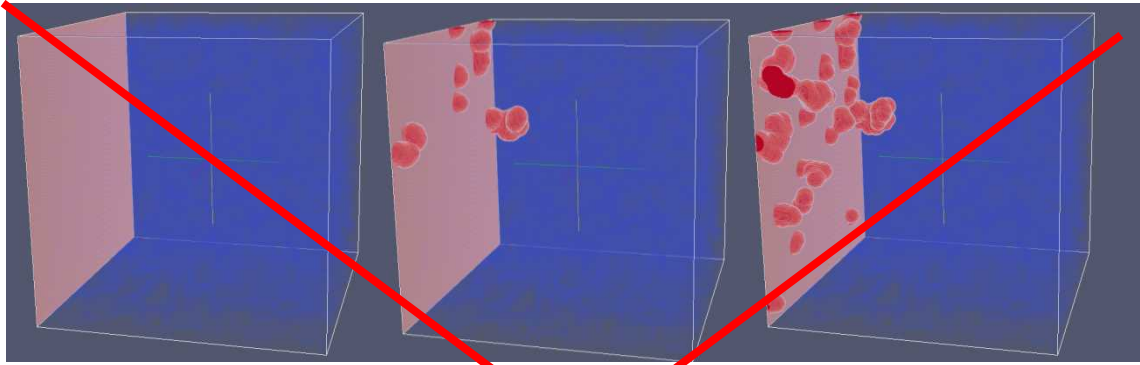

(a)  $S_r=100\%$  ,  $h_p=0$  at A

(b)  $S_r = b\%$  at  $h_p = B$

(c)  $S_r = c\%$  at  $h_p = C$

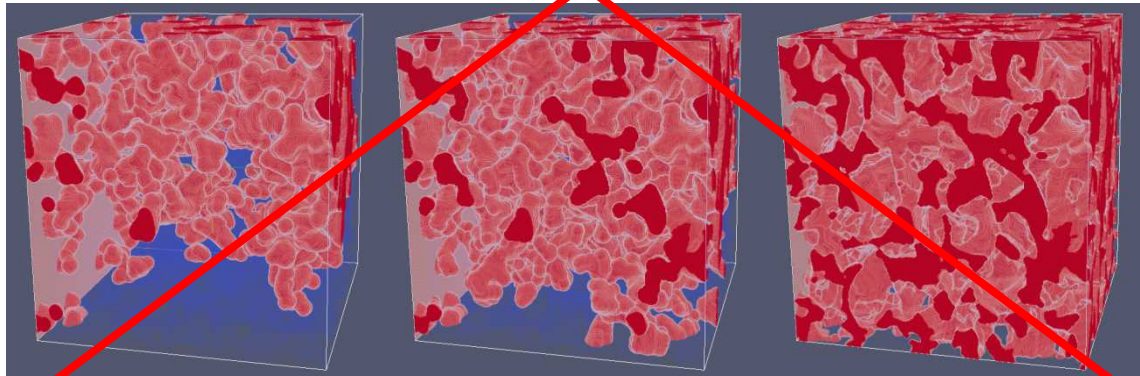

(d)  $S_r = d\%$  at  $h_p = D$

(e)  $S_r = e\%$  at  $h_p = E$

(f)  $S_r = f\%$  at  $h_p = F$

Figure 12: Voxel percolation method in grains

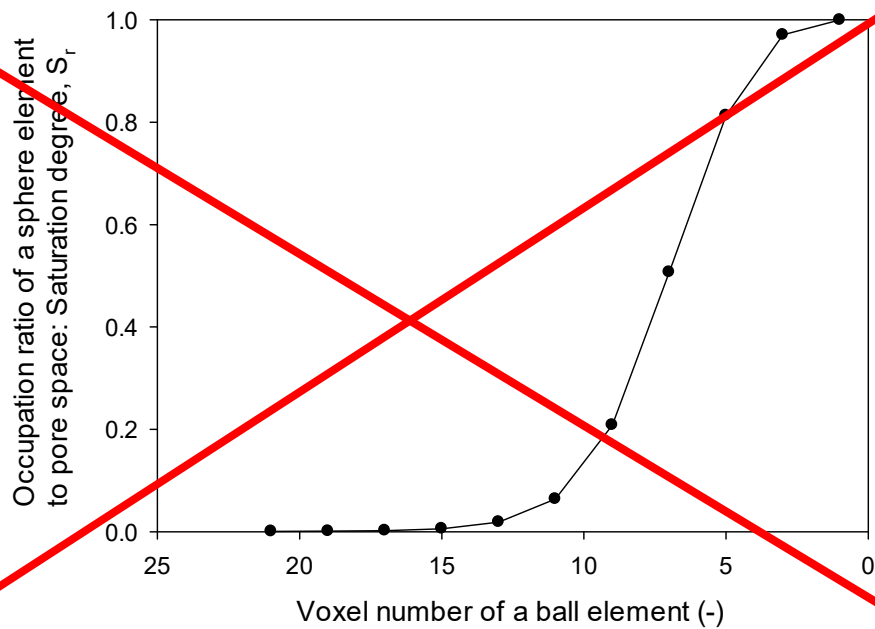

Figure 13: Profile of occupation ratio of the sphere element

#### 4.4 Verification of pore structure analysis

Figure 8 shows a binary 3D image of the pore space of Toyoura sand based on the method in Section 3.1. In this figure, the soil particles are invisible. Figures 9 (a)–(e) show binarized X-ray CT images obtained from Figure 8 in two dimensions after the GIA using 13 different spherical elements, and Figure 9 (f) shows the final analysis results by overlapping each result. White represents the pore space, and black represents the soil particles. Eventually, this image processing was conducted in three dimensions to obtain a 3D map, as shown in Figure 10. Visually, each color element is uniquely distributed, as shown in Figure 10. Two neighboring elements from the 3D map are found to have neighboring colors in the color bar. That is, the pore size has a continuous distribution. From the viewpoint of hydraulic behavior, the local velocities of the pore water are always different at each pore.

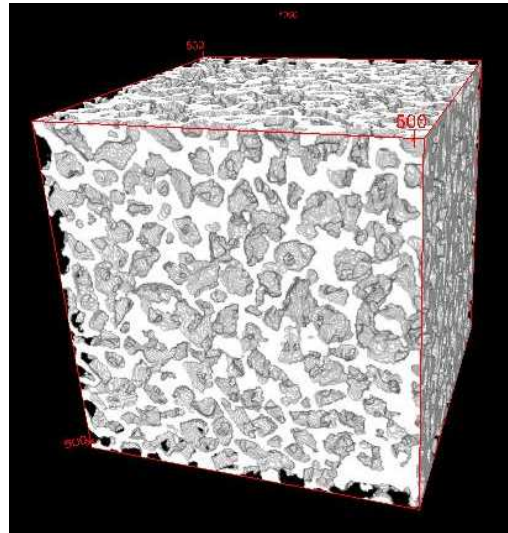

Binary image of pore space for Toyoura sand

Figure 8: X-ray CT image of pore in Toyoura sand in 3D

Figures 11 (a)–(f) show X-ray CT images simulated from the VPM analysis in dimensions of 300 voxel at each capillary pressure analyzed by equation (5). Figure 11 (g) shows the occupation ratio of the cumulative volume of the spherical elements obtained from Figures 11 (a)–(f). In fact, the occupation ratio of the cumulative volume of the spherical element countervails the volume ratio of air in the pore structure; therefore, the degree of saturation can be evaluated by subtracting the cumulative volume of the spherical elements from the entire pore volume. This is expressed as

$$S_r = 1 - \frac{\sum_i^n B_i - \sum_i^n B_i \cap B_{i-1}}{V_T} \quad (6)$$

where  $V_T$  is the volume of entire pore structure. The number of voxels counted produces the degree of saturation ( $S_r$ ); hence, the WRC for drainage can be obtained as an image-analyzed curve. Figure 12 presents a comparison of the degree of saturation obtained from Figure 11 and that from the Toyoura sample; thus, the analyzed degree of saturation was verified from the results in Figure 12. Figure 13 shows the WRC analysis results for five different voxel sizes. ~~Refer to Figure 5(b) to determine the effect of voxel number on analysis results.~~ The authors validated the effect of the voxel size on the WRC. In Figure 13, the test results obtained from a laboratory test are also plotted. Focusing the effect of the voxel dimension as the REV, when  $S_r$  is greater than 0.8, it is observed that a lower voxel dimension yields a 50% underestimation of the measured data to an air entry pressure as a result of decrease in  $S_r$ , remarkably. In this case, as shown in Figure 11, the voxel dimension of 100 is not sufficient to become the REV for the WRC evaluation, where  $S_r$  is greater than 0.8; however, there is no difference between the voxel dimensions where  $S_r$  is less than 0.5. Provided that the voxel dimension is greater than 300 on the basis of all of the issues discussed, the VPM could provide a reasonable pore diameter, and it is concluded that the diameter of the spherical element can be interpreted as the pore diameter.

Despite the small change in the capillary pressure between 30 and 40 cm,  $S_r$  decreased from 0.9 to 0.3. This behavior indicates that the mean pore size caused by a capillary pressure head of 30–40 cm is distributed in the saturation degree between 0.2 and 0.9 as shown in Figure 13. This behavior should be caused by sands with a value less than the uniform coefficient obtained from the sieving test.

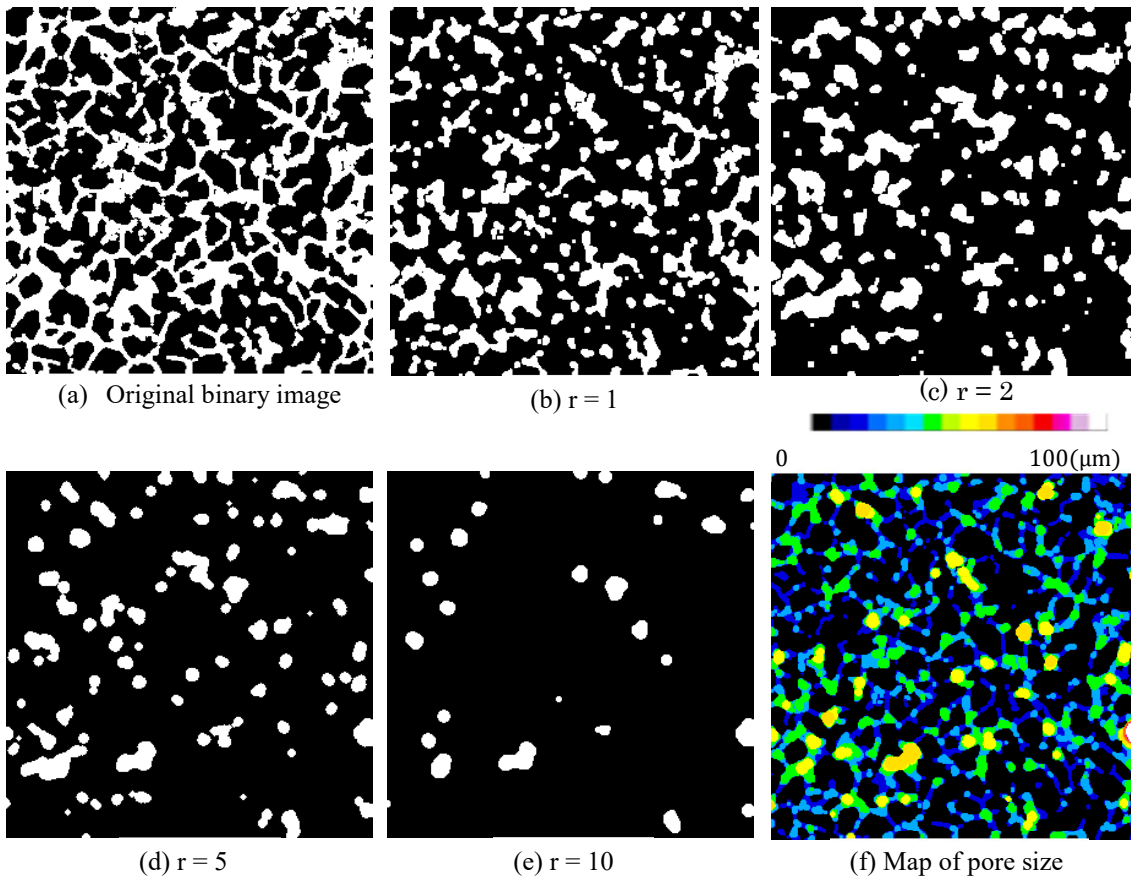

Figure 9(a), (b), (c), (d), (e), (f): X-ray CT images obtained from GIA

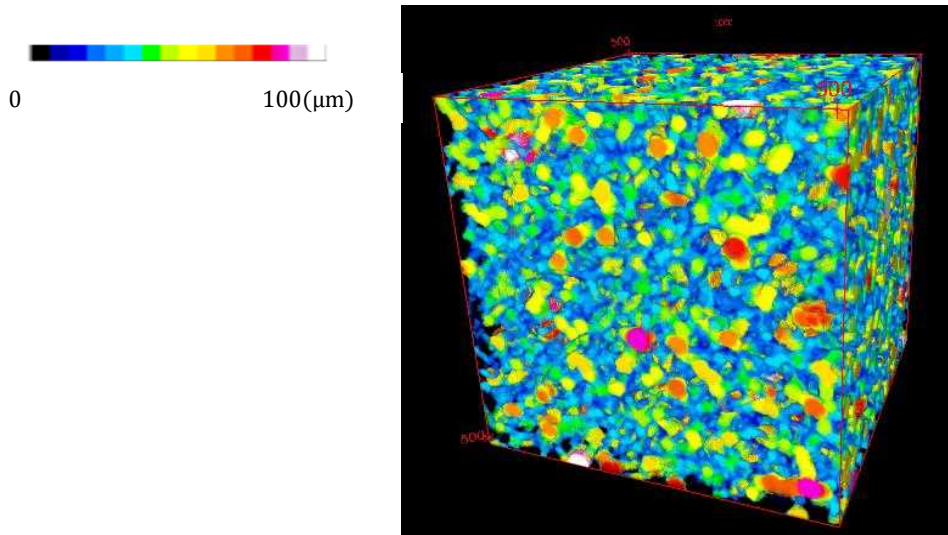

(b) 3D map of pore space for Toyoura sand

Figure 10 Distribution of perforated pore size in 3D

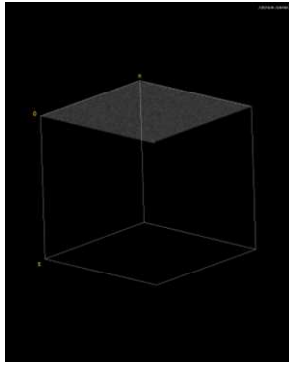

(a)  $S_r=100\%$  t  $h_p=0\text{cm}$

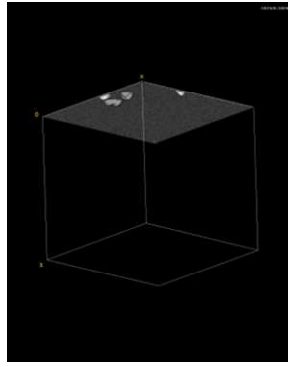

(b)  $S_r = 99.8\%$  at  $h_p=16.9\text{cm}$

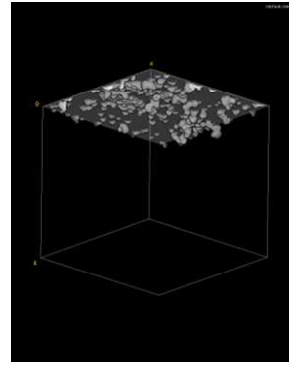

(c)  $S_r = 99\%$  at  $h_p=20.4\text{cm}$

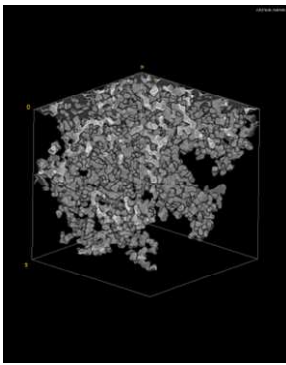

(d)  $S_r = 90\%$  at  $h_p = 29.9 \text{ cm}$

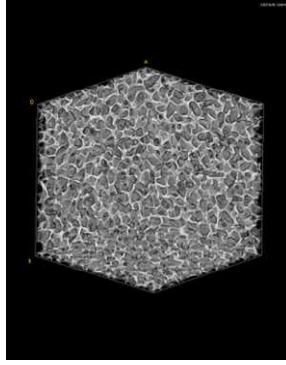

(e)  $S_r = 27\%$  at  $43.2\text{cm}$

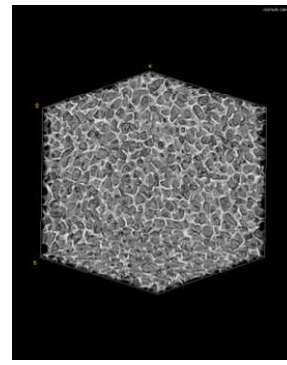

(f)  $S_r = 4.4\%$  at  $h_p=77.8\text{cm}$

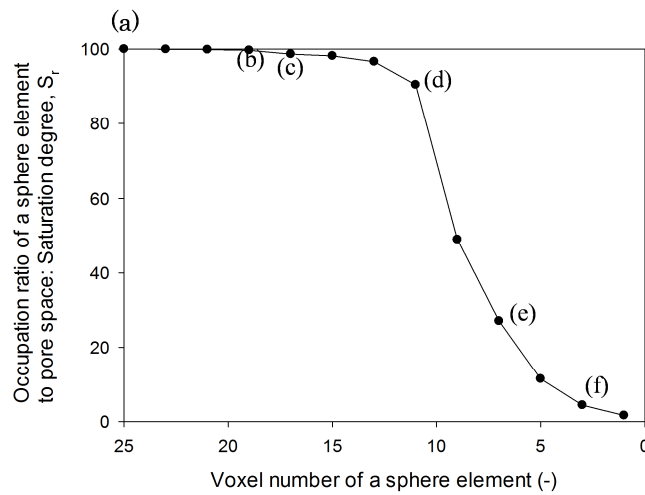

(g) Profile of  $S_r$  due to changing in the voxel number of a spherical element

1  
2 Figure 1811: CT images of percolated pore space as the drainage process



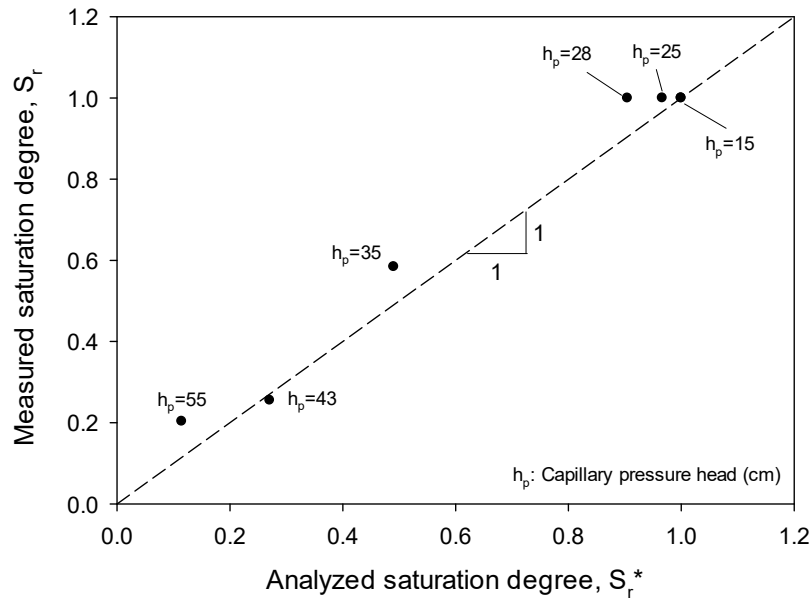

1  
2 | Figure 1219: Comparison of saturation degree measured and analyzed at each capillary pressure

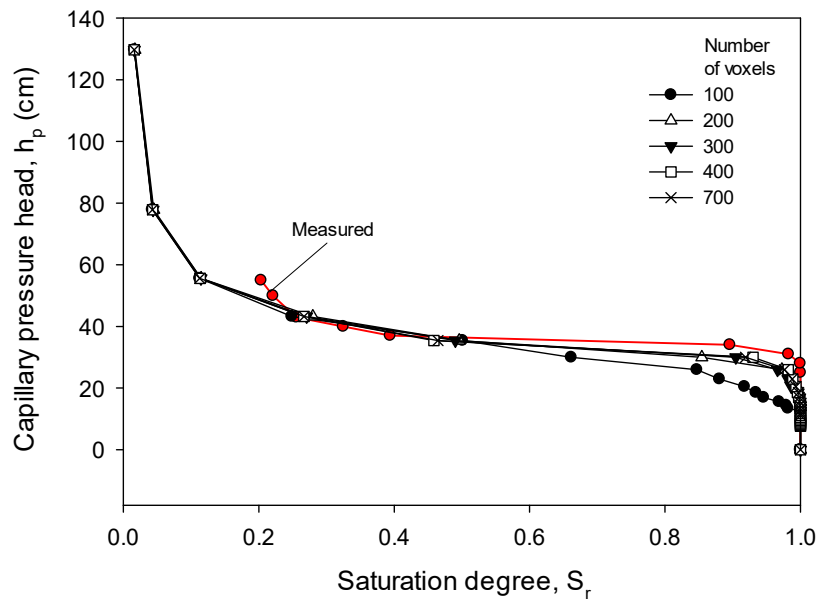

3  
4 | Figure 2013: Water retention curves obtained from image analysis and experiment

#### 5 6 7 | 4.5.4 Discussion

8 Mostaghimi et al. (2013) and Muljadi et al. (2015) evaluated the permeability using the image data  
9 of the pores. They also discussed the REV of their sample and analyzed the pore structure using  
10 image data. The studies that consider a pore structure ~~are fluid mechanics~~, in geoenvironmental  
11 engineering and petroleum engineering have to evaluate the degree of saturation and the capillary

pressure; a CT image can provide the degree of saturation without the use of any model. The capillary pressure is the driving force for transferring fluids in the unsaturated condition; however, it is difficult to define the capillary pressure in porous media on the basis of both experimental work and an image analysis if the relationship between the pore size and the capillary pressure is modeled. ~~[Blunt (2001),~~ Blunt et al. (2002) discussed the capillary pressure in porous media using Poiseuille's law to evaluate the relative permeabilities of oil and water, Blunt et al. (2013) and, ~~Mostaghimi et al. (2013)~~ Iglaouer et al. (2013) analyzed the basic physical properties of pores from a CT image; in particular, Blunt et al. (2013) first estimated the relative permeability and then obtained the WRC from the relative permeability distribution. ~~and Muljadi et al. (2015)]~~ The issues of how to model the migration of oil in porous media such as rocks/soils and how to inject air for remediating contaminated soil by fuels require that the water/oil flow in the soil quantitatively understands the pore structure. ~~[Morrow and Songkran (1981), Parker et al. (1987), Pantazidou and Sitar (1993),~~ Mayer and Miller (1993) visualized blobs of nonaqueous phase liquids (NAPLs) in a model test and deduced the blob diameter using the Young-Laplace equation, the number of capillaries, and the number of bonds; in short, the model was used to evaluate the pore size, ~~and Soga et al. (2003)]. Normally, the distribution of pore diameters should be required to evaluate the water retention curve (WRC) as a hydraulic property of soils.~~ The MIT, SEM, and AIM [Sato et al. (1992), Kamiya et al. (1996), and Uno et al. (1998)] have been used to measure the pore diameter. In general, the MIT is used to evaluate the pore size in clay. Sato et al. (1992) and Kamiya et al. (1996) attempted to develop a method to evaluate the pore size in sandy soil. Uno et al. (1998) included the moisture characteristic in the results obtained from an AIM [Kamiya et al. (1996)] and proposed the moisture characteristic curve method (MCCM). The measurement principle of the AIM is similar to that of the MIT, and the obtained pore size is evaluated as the diameter of a pipe; however, the water contents were not measured. Uno et al. (1998) deduced the capillary pressure head using Darcy's equation for air permeation, and then, they evaluated the pore size on the basis of a pipe model [Kamiya et al. (1996)]. A WRC is constructed using the degree of saturation and the capillary pressure head measured by the head method with suction or given by Young-Laplace's law with the diameter of a pipe as the representative pore diameter. The AIM gives the statistical distribution of a pore diameter model of sandy soil as a glass tube. In short, the pore diameter is defined as the diameter of the tube, as per the implicit agreement in a number of papers.

Figure 21-14 shows the distribution of a perforated pore diameter for Toyoura sand. ~~and the pore diameter deduced by the air intrusion method (AIM) proposed by Uno et al. (1998).~~ A spherical

element is representative of the pore size in this study. The GIA counts the number of voxels for each size of the spherical elements; therefore, we can determine the total number of voxels, which can be multiplied by the volume of one voxel to obtain the total pore volume. Then, it is possible to calculate the percentage of the perforated spherical element for each size of the spherical element on the basis of the volume of the spherical element as the percent finer by volume in Figure 14. ~~Figure 22 presents the relationship between the image analysis area and the perforated pore diameter in this study. Figure 22 verifies that the cubic area of more than 300 voxels can provide the constant perforated pore diameter for each percent finer by volume. Hence, the results analyzed in a cubic of 300 voxels is compared with Uno et al. (1998).~~ Figure 15 presents a comparison between the pore diameters deduced by Uno et al. (1998) and those of the authors. In particular, the measured results between 0.065 and 0.85 mm have a better fit than those between 0.03 and 0.055 mm. This indicates that the AIM overestimated between 0.03 and 0.055 mm. The AIM by Uno et al. (1998) supposes that the pore space in sand exists in a tubular form. Since air wants to intrude a large pore space, it is thought that the evaluation of the pore size by the AIM has a high precision; however, the precision decreases for the evaluation of pore space with a small size, where air does not smoothly intrude. On the other hand, the VPM can easily evaluate the size of a complicated pore space regardless of the physical interaction and does not assume that the complicated pore is a straight tube. Hence, these results imply that the pore size obtained from AIM is not a Poiseuille distribution.

The VPM also evaluates the connectivity of the pore space. The GIA provides the number of voxel of the spherical element and the spatial distribution with the VPM. The AIM can also provide the pore diameter as the inner diameter of a pipe but not the spatial distribution of the pore diameter. This issue indicates that the VPM has the advantage of being able to estimate the WRC. In fact, the distribution in Figure 14 can provide a pore-size distribution function (PDF) with respect to the perforated pore diameter. The PDF can also provide the degree of saturation by the sum of the spherical element. Figure 16 presents the WRC analyzed by the VPM and PDF in this study. The WRC obtained from the PDF was far from the results of the VPM in terms of the measured points. The definition of the pore size could be requested based on Figure 16. As described in Section 4.1, the VPM considers percolation using cluster labeling based on the connectivity of the pore spaces. On the other hand, the PDF does not utilize percolation concepts. Figure 16 shows that a reasonable WRC can be obtained from the degree of saturation and the distribution of pore diameter using the properties of percolation. Therefore, it is significantly useful that the GIA and VPM can estimate the

1 water retention property on the basis of the geometry of the pore structure without performing a  
2 WRC test.

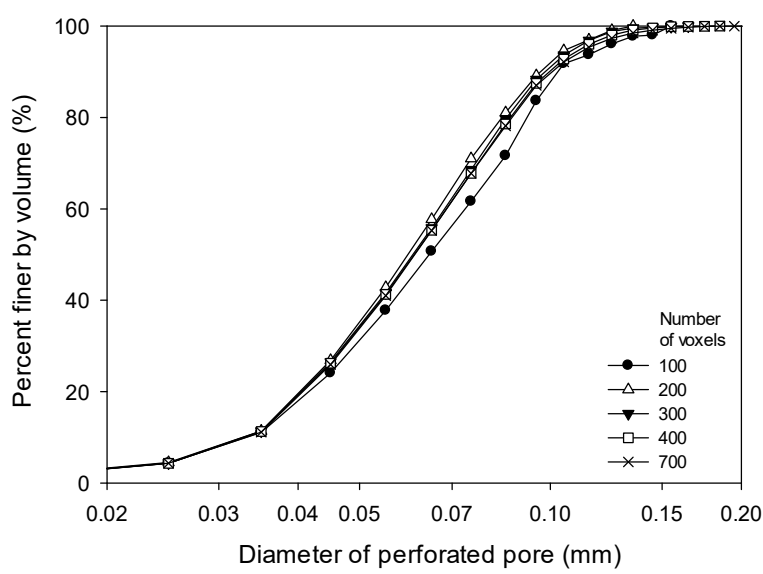

3  
4  
5 Figure 21: Perforated-pore size distribution for each image size

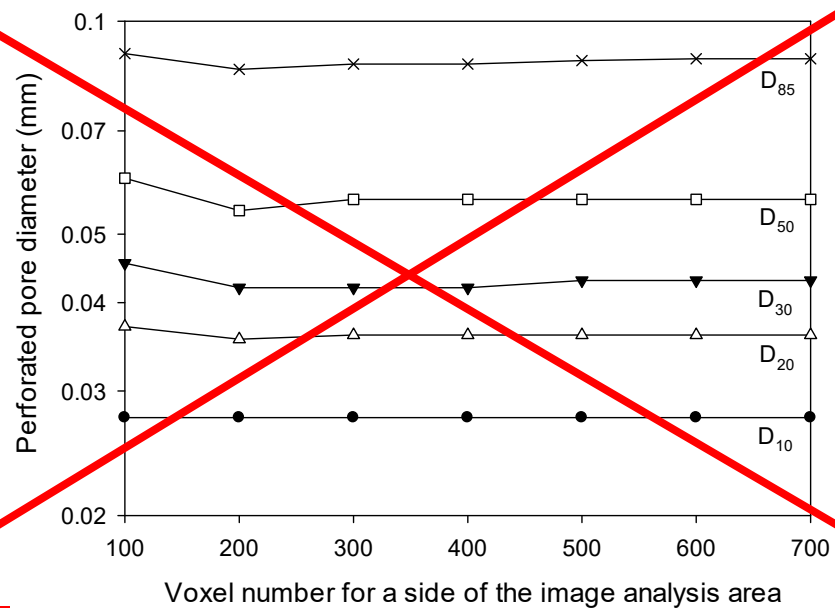

6  
7 ~~Figure 22: Pore-size distribution curve in image size~~

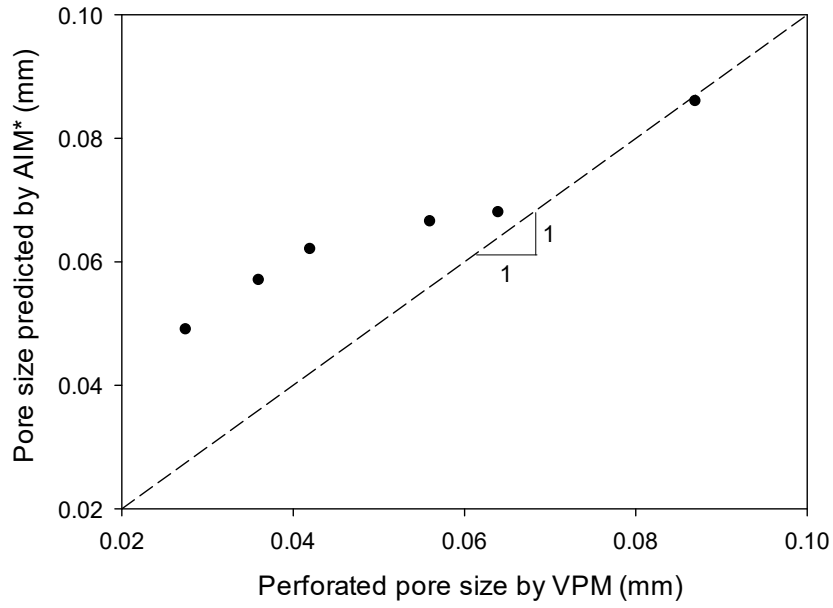

Figure 2315: Comparison of pore size obtained from AIM and VPM

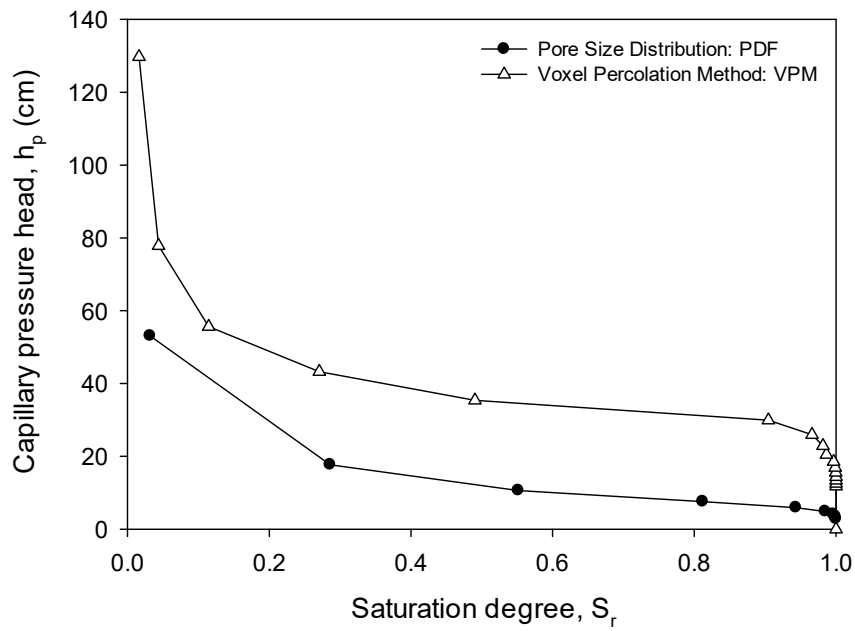

Figure 2416: Water retention plots obtained from GMI and VPM

## 5. CONCLUSIONS

In this study, a specimen of Toyoura sand was scanned using a microfocused X-ray CT scanner, and the 3D spatial distribution of a spherical element as the pore diameter-size ( $d$ ) was visualized and

evaluated quantitatively by a GIA. The GIA is a useful image analysis method for evaluating the pore diameter in a 3D CT image. Moreover, the VPM was newly developed in this study, and it was validated by comparing the analyzed WRC with the measured results. The key conclusions are summarized as follows:

- 1) The size of a voxel affected the results of the image analysis. When the size of one voxel was  $5 \times 5 \times 5 \mu\text{m}^3$ , the REV for evaluating the physical properties of granular materials, which are similar to Toyoura sand, was at least 300 voxels for the evaluation of the grain size, porosity, surface area, and perforated pore diameter. In particular, it was possible for the porosity and surface area to be evaluated with an RSD of less than 1%.
- 2) The results of the GIA show that the perforated pore diameter was less than the pore diameter from the AIM and less than 0.068 mm; moreover, mostly similar pore diameters were evaluated near 0.085 mm. Hence, the AIM provided partially different pore diameters from the results of the GIA. This issue revealed that the pore diameter obtained from the AIM was not a Poiseuille distribution.
- 3) The AIT can estimate the pore diameter as the diameter of a pipe and the occupation ratio; however, the spatial information is not included. Therefore, it was difficult to assess the WRC based on the pore diameter and its occupation ratio. In contrast, the newly proposed VPM in this study can distinguish each spherical element by labeled number corresponding to the radius of the spherical element. As a result, the connectivity of complex pore spaces can be evaluated; therefore, the VPM provides a WRC close to the measured result.
- 4) It was concluded that the VPM can easily evaluate the size of a complicated pore space regardless of the physical interaction and does not assume that the complicated pore is a straight tube. Then, the capillary pressure head can be deduced ~~was the better image analysis method, which could estimate the water retention property due to drainage by percolation using cluster labeling (i.e. pore space) and capillary pressure head~~ on the basis of the Young–Laplace equation as long as precise image data of the pores in sand were obtained by a microfocused X-ray CT scanner.

The second, third, and fourth conclusions are based on the first conclusion. The appropriate dimension for the image analysis should be defined on the basis of the particle diameter and voxel size. When using a microfocused X-ray CT scanner, a smaller sample should be scanned if a greater resolution is required. In future work, it will be necessary to verify the appropriate dimensions (i.e.,

the REV) for several types of grains with round and angular shapes and wide range of grain sizes. These features will further clarify the issue of pore connectivity with respect to the aspect ratio, which affects the results of the WRC.

## ACKNOWLEDGEMENT

This research was supported by a Grant-in-Aid for Scientific Research (C) No. 26420483. The authors thank Prof. Laurent Oxarango, who is an associate professor at the University of Joseph Fourie, for his helpful comments. We also thank Ms. Hitomi Ohta, Chiaki Nagai, and Yusaku Fujiki, who were a former bachelor's and graduate school students at Kumamoto University, and Mr. Toru Yoshinaga and Mr. Takahiro Yoshinaga, who are part of the technical staff at the X-Earth Center, for their sincere contribution to this research.

## REFERENCES

~~Alshibli, A. K. and Reed, H. A. ed.(2010), "Advances in Computed Tomography for Geomaterials", Proc. of GeoX2010, ISTE, WILEY~~

Altman, J. S., Peplinski, J. W. and Rivers, L. M. (2005), "Evaluation of synchrotron X-ray computerized micro tomography for the visualization of transport processes in low-porosity materials", Journal of Contaminant Hydrology, 78, pp. 167-183.

Andrew, M., Bijeljic B. and Blunt, J. M. (2014), "Pore-by-pore capillary pressure measurements using X-ray microtomography at reservoir conditions: Curvature, snap-off, and remobilization of residual CO<sub>2</sub>", Water Resource Research, 50, pp. 8760-8774. Doi:10.1002/2014WR015970.

Andrew, M., Bijeljic B. and Blunt, J. M. (2015), "Reservoir condition pore-scale imaging of multiple fluid phase using x-ray microtomography", Journal of Visualized Experiment, 96, e52440, doi:10.3791/52440.

~~Bear, J. (1972), "Dynamics of fluids in porous media", Dover Publications Inc., pp. 439-573.~~

Blunt J.M., Jackson, D. M., Piri, M. and Valvatne, H. P. (2002), "Detailed physics, predictive capabilities and macroscopic consequences for pore-network models of multiphase flow", Advances in Water Resources, 25, pp. 1069-1089.

~~Blunt, J.M. (2001), "Flow in porous media—pore network models and multiphase flow", Current~~



1 ~~Opinion in Colloid & Interface Science, 6, pp. 197-207.~~

2 Blunt, J.M., Bijeljic, B., Dong, H. Gharbi., O., Iglauer, S., Mostaghimi, P., Paluszny, A. and  
3 Pentland, C. (2013), “Pore-scale imaging and modelling”, Advances in Water Resources, 51, pp.  
4 197-216 (<http://dx.doi.org/10.1016/j.advwatres.2012.03.003>).

5 ~~Brooks R. H. and Corey A. T. (1964), “Hydraulic properties of porous media”, Colorado State Univ.,~~  
6 ~~Hydrology Paper, 3, pp.27.~~

7 Carman, P. C.(1939), “Permeability of saturated sands, soils and clays”, The Journal of Agricultural  
8 Science, 29(2), pp. 262-273.

9 Chanpui, R. P. (2004), “Predicting the saturated hydraulic conductivity of soils: a review”, Bulletin  
10 of Engineering Geology and the Environment, August 2012, 71(3), pp. 401-434.

11 Chatzis, I. Morrow, N., and Lim, H. (1983), “Magnitude and detailed structure of residual oil  
12 saturation”, Old SPE Journal, 23(2), pp. 3311-3326.

13 ~~Cnudde, V. and Bernard, D. edt. (2013), “Tomography of materials and structures”, Proc. of 1st~~  
14 ~~International Conference on Tomography of Materials and Structures; ICTMS 2013, July 1-5~~  
15 ~~(Ghent, Belgium).—~~

16 Culligan, K, Wildenschild, D., Christensen, B., Gray and W., Rivers, M. (2006), “Pore-scale  
17 characteristics of multiphase flow in porous media: A comparison of air–water and oil–water  
18 experiments”, Advances in Water Resources, 29(2), pp. 227-238

19 ~~Desrues, J., Chambon, R., Mokni, M. and Mazerolle, F. (1996), “Void ratio evolution inside shear~~  
20 ~~bands in triaxial sand specimens studied by computed tomography”, Géotechnique, 46(3), 529-546.~~  
21 ~~Desrues, J., Viggiani, G., and Besuelle, P. edt. (2006), “Advances in X-ray Tomography for~~  
22 ~~Geomaterials”, Proc. of the 2nd International Workshop on X-ray CT for Geomaterials, GeoX 2006.~~

23 Dullien F.A.L. (1992), “Porous media fluid transport and pore structure”, ACADEMIC PRESS,  
24 INC., pp. 132-138.

25 Fujiki, Y., Nagai, C., Oxarango, L. and Mukunoki, T. (2014), “Representative elementary volume  
26 determination using x-ray computed tomography”, Proc. of 13th Global Joint Seminar on

1 Geo-Environmental Engineer, pp. 64-70.

2 Gharbi, O. and Blunt, J.M. (2012), “The impact of wettability and connectivity on relative  
3 permeability in carbonates: A pore network modeling analysis”, *Water Resource Research*, 48,  
4 W12513, doi:10.1029/2012WR011877

5 ~~Helming, R. (1997), “Multiphase Flow and Transport Processes in the Subsurface,” Springer Verlag,~~  
6 ~~Berlin Heidelberg.~~

7 Higo, Y., Oka, F., Kimoto, S., Sanagawa, T., and Matsushima, Y. (2011), “Study of strain  
8 localization and microstructural changes in partially saturated sand during triaxial tests using micro  
9 focus X-ray CT”, *Soils & Foundations*, 51(1), pp. 95-111.

10 Iglaer, S., Paluszny, A. and Blunt, J.M. (2013), “Simultaneous oil recovery and residual gas  
11 storage: A pore-level analysis using in situ X-ray micro-tomography”, *Fuel*, 103, pp. 905-914  
12 (<http://dx.doi.org/10.1016/j.fuel.2012.06.094>)

13 Kamiya, K. Uno, T., and Matsushima, T. (1996), “Measurement of the distribution of sandy soil  
14 void diameter by air intrusion method”, *Journal of Japan Society of Civil Engineering*,  
15 No.541/III-35, pp. 189-198. (in Japanese)

16 Kato, M., Takahashi, M., Kawasaki, S., Mukunoki, T., and Kaneko, K. (2013): “Evaluation of  
17 porosity and its variation in porous materials using microfocus x-ray computed tomography  
18 considering the partial volume effect”, *Materials Transactions*, 54(9), pp. 1678-1685.

19 Luis I., Will S., Lysia N., and Josh, C. (2005), “The ITK Software Guide”, Second Edition Updated  
20 for ITK version 2.4, ITK.

21 Mayer, A.S. and Miller, C.T. (1993), “An Experimental Investigation of Pore-Scale Distributions of  
22 Nonaqueous Phase Liquids at Residual Saturation”, *Transport in Porous Media*, 10, pp. 57-80.

23 ~~Miura, K., Matsumoto, Y., Hasegawa, K. and Toki, S. (1989), “The influence of grain shape and~~  
24 ~~grain size distribution on physical properties of sands”, *Bulletin of the Faculty of Engineering,*~~  
25 ~~Hokkaido University~~, 148, pp. 17-31. (in Japanese).

26 ~~Morrow, N.R., and Songkran, B. (1981), “Effect of viscous and buoyancy forces on non-wetting~~  
27 ~~phase trapping in porous media”, *Surface Phenomena in Enhanced Oil Recovery*, Plenum Press, pp.~~

1 ~~387-411.~~

2 Mostaghimi, P., Blunt, J. M. and Bijeljic, B. (2013), “Computations of absolute permeability on  
3 micro-ct images”, *Math Geoscience* 45, pp. 103-125 (DOI 10.1007/s11004-012-9431-4)

4 Mualem, Y., (1976), “A new model for predicting the hydraulic conductivity of unsaturated porous  
5 media”, *Water Resources Research*, 12, pp. 513-522.

6 Mukunoki, T. Fujimi, T. and Matsumoto, H. (2014), “Image segmentation and its quantitative  
7 evaluation of X-ray CT data of geomaterials using EM algorithm, *Japanese Geotechnical Journal*, 9  
8 (4), pp. 555-567. (in Japanese)

9 ~~Mukunoki, T., Sugimura, K., and Mikami, M. (2010), “Visualization of LNAPL contamination in  
10 sandy soil using X-ray CT scanner”, *Proc. of International Symposium on Earth Science and  
11 Technology 2010*, pp. 153-158.~~

12 Muljadi, B., P., Blunt, J. M. Raeini, Q. A., and Bjijelic, B. (2015), The impact of porous media  
13 heterogeneity on non-Darcy flow behavior from pore-scale simulation, *Advances in Water  
14 Resources*, 000, pp. 1-12 (<http://dx.doi.org/10.1016/j.advwaters.2015.05.019>)

15 ~~Ojuri, O. O. and Fijabi, O. D. (2012), “Standard sand for geotechnical engineering  
16 andgeoenvironmental research in Nigeria: Igbokoda sand”, *Advances in Environmental Research*,  
17 1(4), pp. 305-321. DOI:10.12989/aer.2012.1.4.305.~~

18 ~~Otani, J., Mukunoki, T. and Obara, Y. (2000), “Application of X-ray CT method for characterization  
19 of failure in soils”, *Soils and Foundations*, 40(2), pp. 111-118.~~

20 ~~Otani, J. and Obara, Y. edt. (2003), “X-ray CT for Geomaterials soils, concrete, rocks”, *Proc. of the  
21 1st international workshop on X-ray CT for Geomaterials, GeoX 2003*.~~

22 Otsu N.(1979), “A Threshold Selection Method from Gray-Level Histograms”, *IEEE Transactions  
23 of Systems, Man, and Cybernetics*, 9(1), pp. 62-66.

24 ~~Pantazidou, M., and Sitar, N. (1993), “Emplacement of nonaqueous liquid in the vadose zone”,  
25 *Water Resources Research*, 29(3), pp. 705-722.~~

26 ~~Parker, J. C., Lenhard, R. J., and Kuppasamy, T. (1987), “A parametric model for constitutive~~

1 ~~properties governing multiphase flow in porous media”, Water Resources Research, 23(4), pp.~~  
2 ~~618-624.~~

3 ~~Riyadh Al-Raoush (2007), “Microstructure characterization of granular materials”, Physica A, 377,~~  
4 ~~pp. 545-558, doi:10.1016/j.physa.2006.11.090~~

5 Sato, T., Soba, T. Kuwayama, T and Uno, T. (1992), “Mercury intrusion technique for macropore  
6 measurement of particulate soil”, Journal of Japan Society of Civil Engineering, No.445/III-18, pp.  
7 139-142. (in Japanese)

8 ~~Soga, K., Kawabata, J., Kechavarzi, C., Coumoulos, H., and Waduge, W. A. P. (2003), “Centrifuge~~  
9 ~~Modeling of Nonaqueous Phase Liquid Movement and Entrapment in Unsaturated Layered Soils”,~~  
10 ~~Journal of Geotechnical and Geoenvironmental Engineering, 129(2), pp. 173-182.~~

11 Soille, P. (2003), “Morphological image analysis: principles and applications”, Springer-Verlag,  
12 Berlin Heidelberg, New York.

13 Taylor, H.F., O’Sullivan, C. and Sim, W.W. (2015), “A new method to identify void constrictions in  
14 micro-CT images of sand”, Computers and Geotechnics, 69 (2015), pp. 279–290,  
15 <http://dx.doi.org/10.1016/j.compgeo.2015.05.012>

16 Tomotsune, M., Ysohitake, S., Matsuda, R. and Koizumi, H. (2015), “Preliminary observations of  
17 soil organic layers using a compact MRI for non-destructive analysis of internal soil structure”,  
18 Ecological Research, 30, pp. 303-310. DOI:10.1007/s11284-015-1242-x.

19 Topp, G. C., and Miller, E. E. (1966), “Hysteretic moisture characteristics and hydraulic  
20 conductivities for glass-bead media”, Soil Science Society of America, Proceedings, 30, pp.  
21 156-162.

22 Uno, T. Kamiya, K. and Tanaka, K. (1998), “The distribution of sand void diameter by air intrusion  
23 method and moisture characteristic curve method”, Journal of Japan Society of Civil Engineering,  
24 No.603/III-44, 35-44. (in Japanese)

25 Yang, F., Hingerl, F. F., Xiao, X., Liu, Y., Wu, Z., Benson, M. S. and Toney, F. M. (2015),  
26 “Extraction of pore-morphology and capillary pressure curves of porous media from synchrotron  
27 based tomography data”, Scientific Reports 5, 10635. DOI:10.1038/srep10635.

- 1 Wildenschild, D. and Sheppard, P.A. (2013), “X-ray imaging and analysis techniques for  
2 quantifying pore-scale structure and processes in subsurface porous medium systems”, *Advances in*  
3 *Water Resources* 51, 217-246, <http://dx.doi.org/10.1016/j.advwatres.2012.07.018>
- 4 Wildenschild, D., Culligan, K.A., and Christensen, B.S.B. (2005), “Application of X-ray micro  
5 tomography to environmental fluid flow problems”, *Proceedings of International Society for*  
6 *Photo-optical Instrumentation Engineers (SPIE): Developments in X-Ray Tomography IV*; Ulrich  
7 Bonse, pp. 432-441.
- 8 Wildenschild, D., Hopmans, J.W., Rivers, M.L., and Kent, A.J. (2005), “Quantitative analysis of  
9 flow processes in a sand using synchrotron-based X-ray microtomography”, *Vadose Zone Journal*, 4,  
10 pp. 112-126.
- 11 Wildenschild, D., Hopmans, J.W., Vaz, C., Rivers, M.L., Rikard, D., and Christensen, B.S. (2002),  
12 “Using X-ray computed micro tomography in hydrology: systems, resolution and limitations”,  
13 *Journal of Hydrology*, 267, pp. 285-297.
